# Supplementary material for: Ranking noncanonical 5′ splice site usage by genome-wide RNA-seq analysis and splicing reporter assays
Source: PubMed Central journal article supplement — Genome Res. 2018 Dec;28(12):1826–40. doi: 10.1101/gr.235861.118 (PMC6280755; doi:10.1101/gr.235861.118), 2018-12
Supplement: supp_gr.235861.118_Supplemental_Fig_S2.pdf [file supp_gr.235861.118_Supplemental_Fig_S2.pdf]

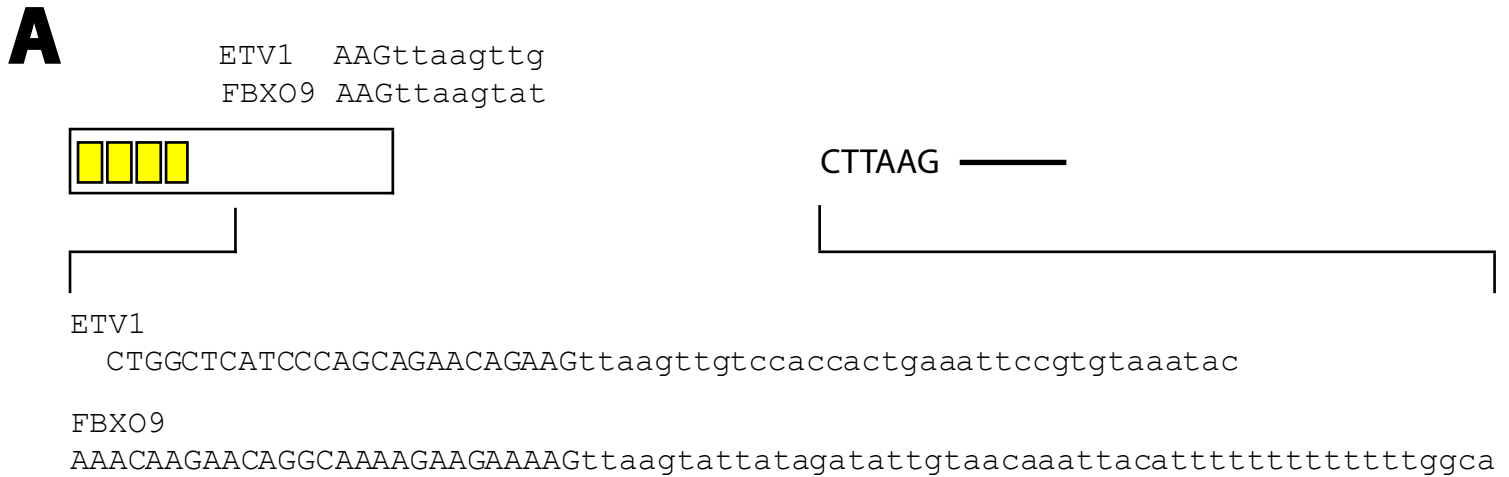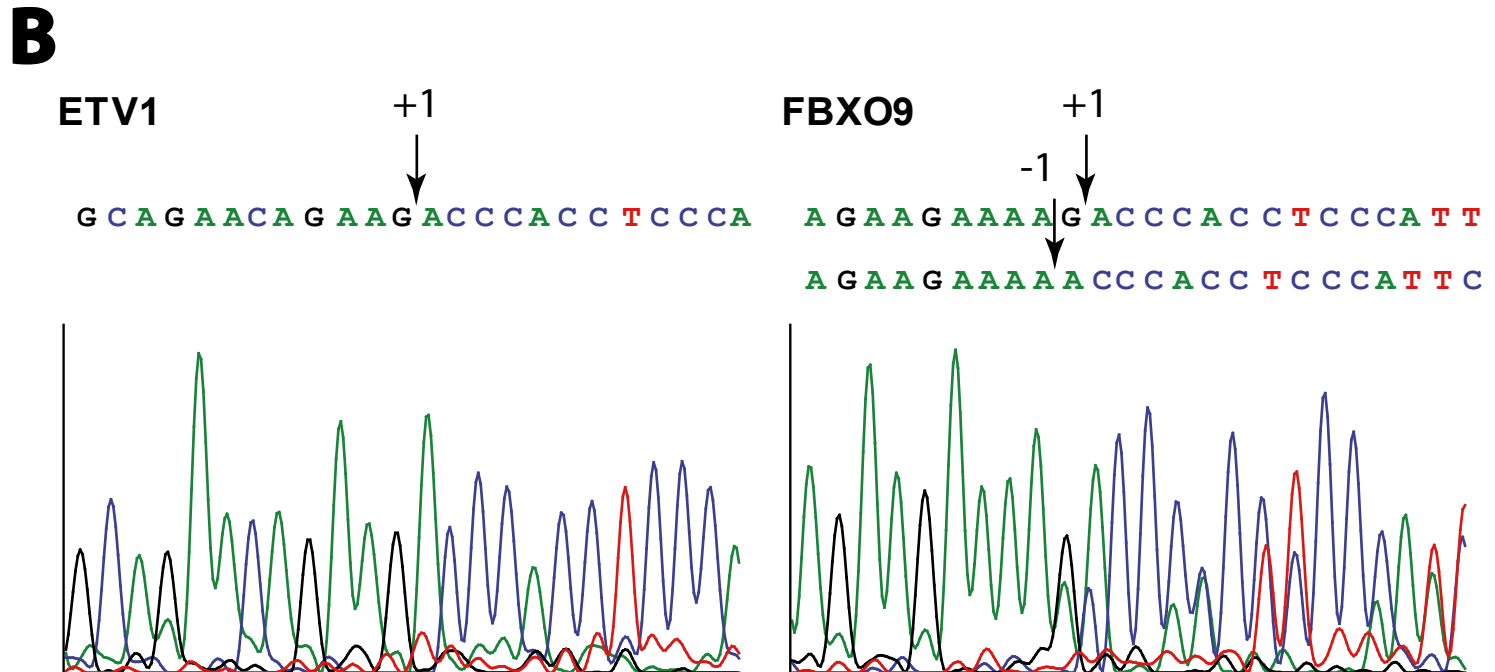

**Supplemental Figure S2: Accuracy of non-canonical TT splicing.**

**(A):** Natural sequence environments for two exemplary 5'ss from genes ETV1 and FBX09 were inserted into the splicing reporter.

**(B):** Sequences of exon-exon junctions. Splicing positions are indicated as e.g. "+1" or "-1".
