# Supplementary material for: Ranking noncanonical 5′ splice site usage by genome-wide RNA-seq analysis and splicing reporter assays
Source: PubMed Central journal article supplement — Genome Res. 2018 Dec;28(12):1826–40. doi: 10.1101/gr.235861.118 (PMC6280755; doi:10.1101/gr.235861.118), 2018-12
Supplement: supp_gr.235861.118_Supplemental_Fig_S4.pdf [file supp_gr.235861.118_Supplemental_Fig_S4.pdf]

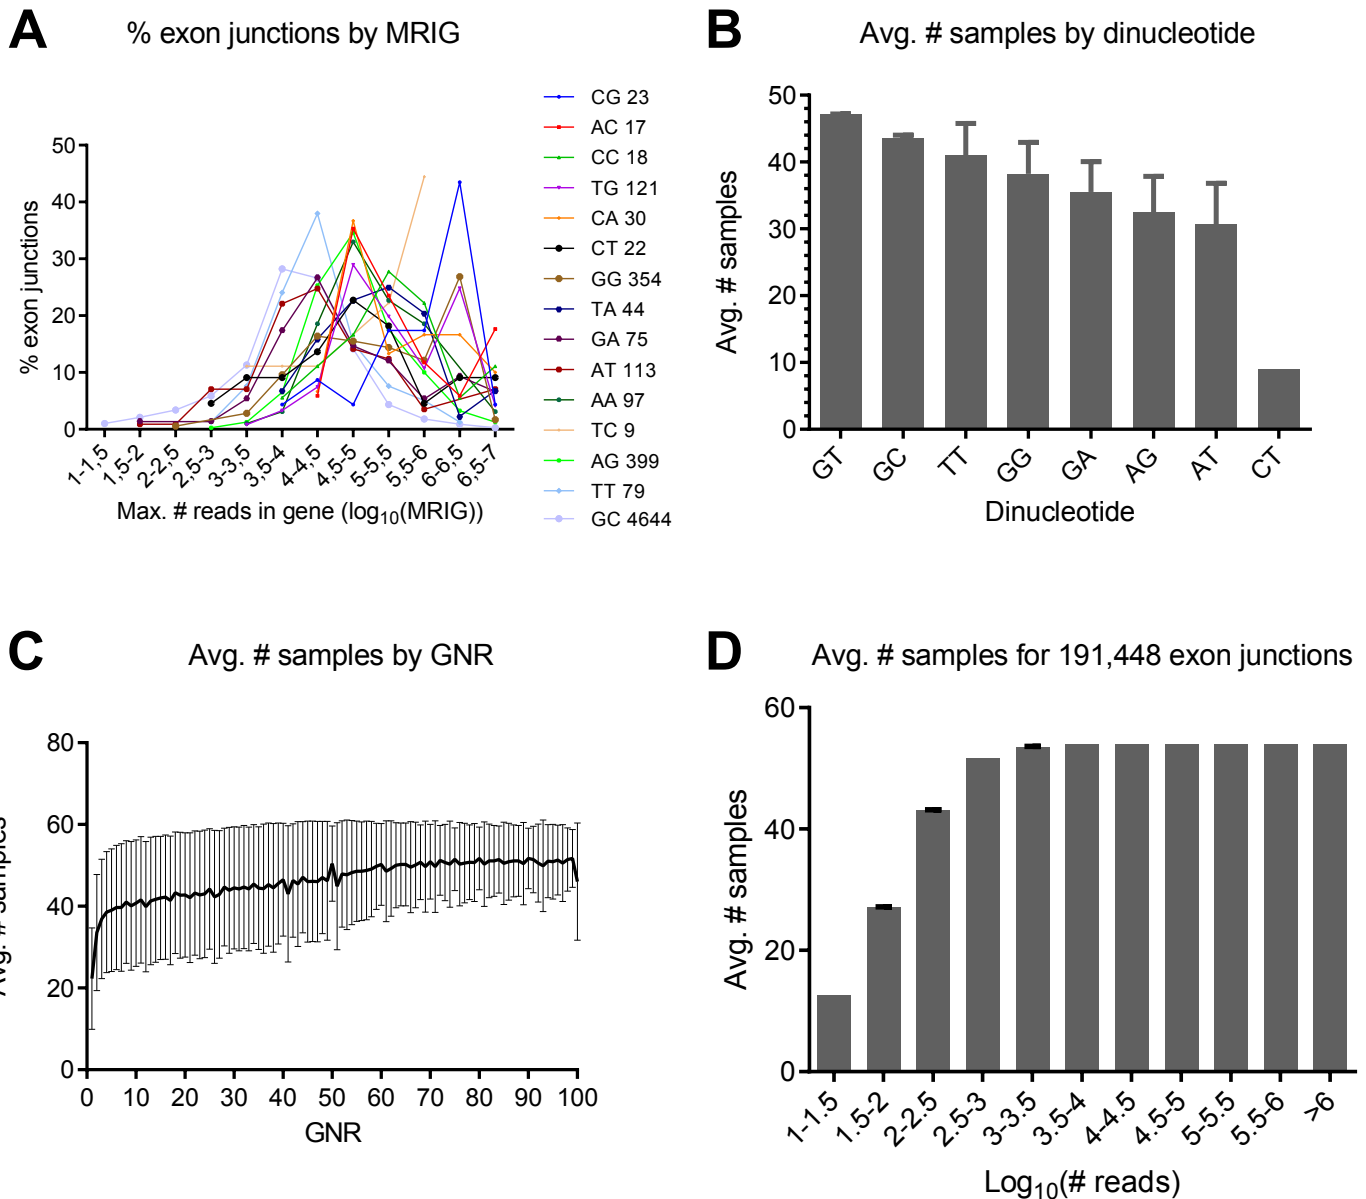

**Supplemental Figure S4: Statistics of high confidence exon junctions with GNR  $\geq 2\%$ .**

**(A):** Distribution of gene expression (MRIG,  $\log_{10}$  scale) in 6,030 exon junctions with non-canonical dinucleotides.

**(B):** Average number of samples for all 191,448 exon junctions with GNR  $>2\%$  (mean  $\pm$  SEM), grouped by dinucleotide.

**(C):** Average number of samples for all 191,448 exon junctions with GNR  $>2\%$  MRIG (mean  $\pm$  SEM), grouped by GNR.

**(D):** Average number of samples for all 191,448 exon junctions with GNR  $>2\%$  (mean  $\pm$  SEM), grouped by absolute number of reads ( $\log_{10}$  scale).
