# Supplementary material for: Ranking noncanonical 5′ splice site usage by genome-wide RNA-seq analysis and splicing reporter assays
Source: PubMed Central journal article supplement — Genome Res. 2018 Dec;28(12):1826–40. doi: 10.1101/gr.235861.118 (PMC6280755; doi:10.1101/gr.235861.118), 2018-12
Supplement: supp_gr.235861.118_Supplemental_Fig_S5.pdf [file supp_gr.235861.118_Supplemental_Fig_S5.pdf]

## Supplemental Fig. S5

Individual F42G2.26

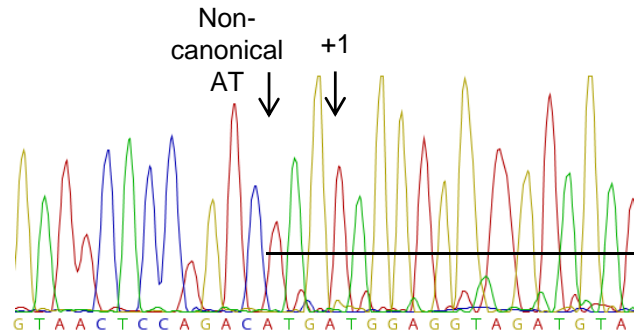

**RLP5:** ENST00000370321.8

Exon 6:

GTTGCAGATTACATGCGCTACTTAATGGAAGAAGATGAAGATGCTTACAAGAAA  
 CAGTTCTCTCAATACATAAAGAACAGCGTAACTCCAGACatGgt

Exon 7:

ATGGAGGAGATGTATAAGAAAGCTCATGCTGCTATACGAGAGAATCCAGTCTA  
TGAAAAGAAGCCAAGAAAGAAGT

Individual F43G2.4

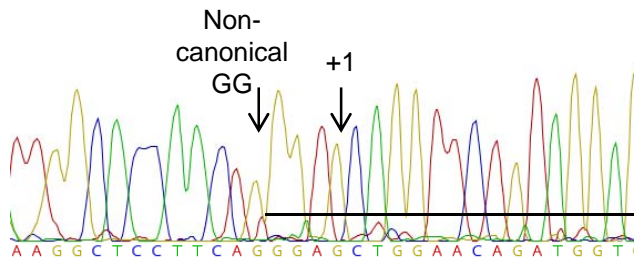

**IKZF5:** ENST00000368886.9

Exon 3:

CAGACCCATCACGTGAACATGATTTCTGGATCAGTTAGTGGGGACAAAGAAGC  
 AGAGGCTCTTCAGGGAGgtaga

Exon 4:

CTGGAACAGATGGTGATCAAATGGACTTGATCACCCATCTGTTGAAGTTTCCT  
TGGATGAAAACCTCAGGAATGTTAGTAGA

## Supplemental Fig. S5

Individual F45G2.10

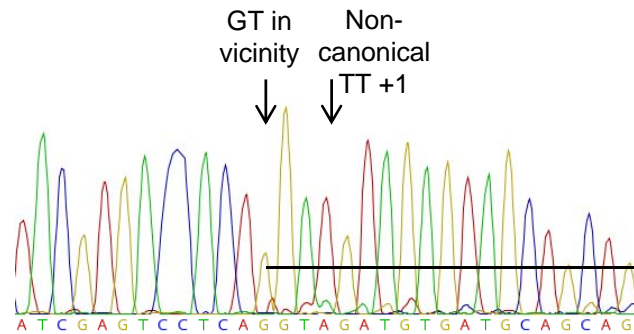

**DDX46:** ENST00000452510.6

Exon 19:

GCTCCAACTGCAGGAAATGCTGAGAAATTAGAAATTGCTAAGAGATTGGCTCTTA

GAATCAATGCCAGAAGAATTTGGGCATCGAGTCTCAGGTAttaagtaa

Exon 20:

GATGTGATGCAGCAGGCCACCAATGCAATTCTTAGGGGTGGCACCATTCTGGCTC

Individual F45G2.28

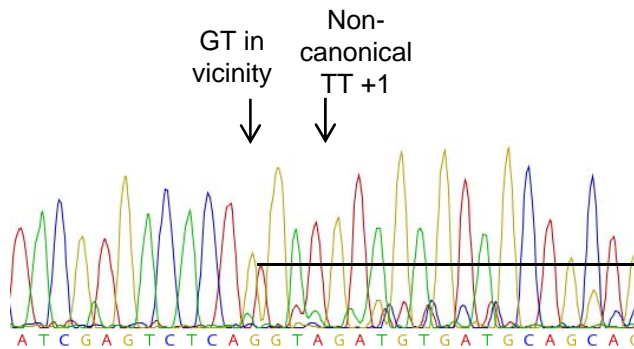

**DDX46:** ENST00000452510.6

Exon 19:

GCTCCAACTGCAGGAAATGCTGAGAAATTAGAAATTGCTAAGAGATTGGCTCTTA

GAATCAATGCCAGAAGAATTTGGGCATCGAGTCTCAGGTAttaagtaa

Exon 20:

GATGTGATGCAGCAGGCCACCAATGCAATTCTTAGGGGTGGCACCATTCTGGCTC

**Supplemental Figure S5: Exemplary sequences of 5'ss pairs from four individuals.** RNA was isolated from  $2 \times 10^6$  fibroblasts from four different individuals. RT-PCRs were run with primers that amplify exon junctions with non-canonical splice donors found by RNA-seq data analysis. Samples were run on a 10% PAA gel and the respective bands were excised and purified before sequencing.
