# Supplementary material for: S40 Turbo replacement procedure
Source: HighWire-hosted journal article supplement (doi:10.1101/gr.235861.118), 2011-02-24
Supplement: Supplemental_Information.docx [file Supplemental_Information.docx]

**Ranking non-canonical 5’ splice site usage by genome-wide RNA-seq analysis and splicing reporter assays**

**Steffen Erkelenz1,2**†**, Stephan Theiss3**†**, Wolfgang Kaisers4, Johannes Ptok1, Lara Walotka1, Lisa Müller1, Frank Hillebrand1, Anna-Lena Brillen1, Michael Sladek1, and Heiner Schaal1***

## Supplemental material

Supplemental_Figure_S1: Sequences of exon-exon junctions for all isolated bands shown in Fig. 2B.

Supplemental_Figure_S2: Accuracy of non-canonical TT splicing.

Supplemental_Figure_S3: Upstream SREs and a second GT at positions -8 and -7 affect the accuracy of TT splice site usage.

Supplemental_Figure_S4: Statistics of high confidence exon junctions with GNR ≥ 2%.

Supplemental_Figure_S5: Exemplary sequences of 5’ss pairs from four individuals.

Supplemental_Table_S1: Primers used for cloning

Supplemental_Table_S2 (A): Primers used for semi-quantitative RT-PCR

Supplemental_Table_S2 (B): Oligonucleotides used for RNA Affinity Chromatography assay

Supplemental_Methods: HBond Score
