# Supplementary material for: S40 Turbo replacement procedure
Source: HighWire-hosted journal article supplement (doi:10.1101/gr.235861.118), 2011-02-24
Supplement: Supplemental_Methods.docx [file Supplemental_Methods.docx]

**Ranking non-canonical 5’ splice site usage by genome-wide RNA-seq analysis and splicing reporter assays**

**Steffen Erkelenz1,2**†**, Stephan Theiss3**†**, Wolfgang Kaisers4, Johannes Ptok1, Lara Walotka1, Lisa Müller1, Frank Hillebrand1, Anna-Lena Brillen1, Michael Sladek1, and Heiner Schaal1***

## Supplemental Methods

### HBond score

The HBond score (HBS) is a dimensionless measure of the overall hydrogen bond pattern binding strength in the 11-nt long duplex between the 5’ss and the 5’ end of U1 snRNA. The HBond score assigns numerical weights to hydrogen bonds and “mismatches” in individual 5’ss positions: the conserved canonical G:C and T:A base pairs in positions +1 and +2 carry hydrogen bond weights of 3.0 and 2.0, respectively, and weights decrease towards both ends of the duplex. Mismatching nucleotides not capable of forming hydrogen bonds with U1 snRNA additionally reduce the weight of surrounding hydrogen bonds in a position dependent manner. In particular, G:U wobble base pairs carry specific weights, and in the neighborhood of a double G:U wobble in positions +3+4, interdependence of up to seven neighboring nucleotides is taken into account.

As a weighted number of hydrogen bonds, the 5’ss HBond score is dimensionless, and its values range from 1.8 (isolated GT) to 23.8 (full U1 snRNA complementarity CAG GTAAGTAT). In 43,464 constitutively used annotated canonical human 5’ss, HBond score values were normally distributed with median 15.1 and standard deviation 2.6.

Using functional splicing assays, 5’ss HBond scores were experimentally validated in a set of ~100 5’ splice sites. In an exemplary dataset from human chromosome 6, comprising 7,839 constitutively used canonical 5’ss and 56,408 decoy GT-sites (not used in alternative transcripts), an HBond score threshold of 10.45 permitted separation of real 5’ss from decoy GT-sites with sensitivity of 96% and specificity of 93%, comparable to the MaxEnt score performance (Yeo and Burge 2004; Hartmann et al. 2008).

A lookup table for all possible 11nt long canonical U1 snRNA binding sites is provided as Supplemental_Table_S3.xlsx.

Hartmann L, Theiss S, Niederacher D, Schaal H. 2008. Diagnostics of pathogenic splicing mutations: does bioinformatics cover all bases? *Front Biosci* **13**: 3252-3272.

Yeo G, Burge CB. 2004. Maximum entropy modeling of short sequence motifs with applications to RNA splicing signals. *J Comput Biol* **11**: 377-394.
