# Supplementary material for: S40 Turbo replacement procedure
Source: HighWire-hosted journal article supplement (doi:10.1101/gr.235861.118), 2011-02-24
Supplement: Supplemental_Table_S1.docx [file Supplemental_Table_S1.docx]

Supplemental Table S1: Primers used for cloning

| Cloned construct | Primer | Sequence |
| --- | --- | --- |
| SV-env/eGFP | | |
| Forward | | |
| SV SRSF7(4x) GT delvpuenv-eGFP | #4939 | 5‘ AAA AAG AGC TCC AGG TAA GTA Tct taa gct ctc cga aga cag tgg c 3‘ |
| SV SRSF7(4x) GA delvpuenv-eGFP | #4940 | 5‘ AAA AAG AGC TCC AGG AAA GTA Tct taa gct ctc cga aga cag tgg c 3‘ |
| SV SRSF7(4x) GC delvpuenv-eGFP | #4941 | 5‘ AAA AAG AGC TCC AGG CAA GTA Tct taa gct ctc cga aga cag tgg c 3‘ |
| SV SRSF7(4x) GG delvpuenv-eGFP | #4942 | 5‘ AAA AAG AGC TCC AGG GAA GTA Tct taa gct ctc cga aga cag tgg c 3‘ |
| SV SRSF7(4x) TT delvpuenv-eGFP | #4943 | 5‘ AAA AAG AGC TCC AGT TAA GTA Tct taa gct ctc cga aga cag tgg c 3‘ |
| SV SRSF7(4x) AT delvpuenv-eGFP | #4944 | 5‘ AAA AAG AGC TCC AGA TAA GTA Tct taa gct ctc cga aga cag tgg c 3‘ |
| SV SRSF7(4x) CT delvpuenv-eGFP | #4945 | 5‘ AAA AAG AGC TCC AGC TAA GTA Tct taa gct ctc cga aga cag tgg c 3‘ |
| SV SRSF7(4x) GT versus GT (10.4) delvpuenv-eGFP | #5004 | 5‘ act aag agc tcCAG GTA AGT ATC CAA ACA ACC AAA CAA CTG GTA GAC CAc tta agc tct ccg aag aca gtg 3**‘** |
| SV SRSF7(4x) GT versus GT (12.2) delvpuenv-eGFP | #4497 | 5‘ act aag agc tcC AGG TAA GTA TCC AAA CAA CCA AAC AAC TGG TAA ACC Act taa gct ctc cga aga cag tg 3‘ |
| SV SRSF7(4x) GT versus GT (15.2) delvpuenv-eGFP | #5034 | 5’ ACT AAG AGC TCC AGG TAA GTA TCC AAA CAA CCA AAC AAC TGG TAA GCC Act taa gct ctc cga aga cag tg 3’ |
| SV SRSF7(4x) GA versus GT (10.4) delvpuenv-eGFP | #5005 | 5‘ act aag agc tcC AGG AAA GTA TCC AAA CAA CCA AAC AAC TGG TAG ACC Act taa gct ctc cga aga cag tg 3‘ |
| SV SRSF7(4x) GA versus GT (12.2) delvpuenv-eGFP | #4498 | 5’act aag agc tcC AGG AAA GTA TCC AAA CAA CCA AAC AAC TGG TAA ACC Act taa gct ctc cga aga cag tg 3‘ |
| SV SRSF7(4x) GA versus GT (15.2) delvpuenv-eGFP | #5035 | 5’ ACT AAG AGC TCC AGG AAA GTA TCC AAA CAA CCA AAC AAC TGG TAA GCC Act taa gct ctc cga aga cag tg 3’ |
| SV SRSF7(4x) GC versus GT (10.4) delvpuenv-eGFP | #5006 | 5‘ act aag agc tcC AGG CAA GTA TCC AAA CAA CCA AAC AAC TGG TAG ACC Act taa gct ctc cga aga cag tg 3‘ |
| SV SRSF7(4x) GCversus GT (12.2) delvpuenv-eGFP | #4499 | 5’act aag agc tcC AGG CAA GTA TCC AAA CAA CCA AAC AAC TGG TAA ACC Act taa gct ctc cga aga cag tg 3‘ |
| SV SRSF7(4x) GC versus GT (15.2) delvpuenv-eGFP | #5036 | 5’ ACT AAG AGC TCC AGG CAA GTA TCC AAA CAA CCA AAC AAC TGG TAA GCC Act taa gct ctc cga aga cag tg 3’ |
| SV SRSF7(4x) GG versus GT (10.4) delvpuenv-eGFP | #5007 | 5‘ act aag agc tcC AGG GAA GTA TCC AAA CAA CCA AAC AAC TGG TAG ACC Act taa gct ctc cga aga cag tg 3‘ |
| SV SRSF7(4x) GG versus GT (12.2) delvpuenv-eGFP | #5000 | 5’act aag agc tcC AGG GAA GTA TCC AAA CAA CCA AAC AAC TGG TAA ACC Act taa gct ctc cga aga cag tg 3‘ |
| SV SRSF7(4x) GG versus GT (15.2) delvpuenv-eGFP | #5037 | 5’ ACT AAG AGC TCC AGG GAA GTA TCC AAA CAA CCA AAC AAC TGG TAA GCC Act taa gct ctc cga aga cag tg 3’ |
| SV SRSF7(4x) TT versus GT (10.4) delvpuenv-eGFP | #5008 | 5‘ act aag agc tcC AGT TAA GTA TCC AAA CAA CCA AAC AAC TGG TAG ACC Act taa gct ctc cga aga cag tg 3‘ |
| SV SRSF7(4x) TT versus GT (12.2) delvpuenv-eGFP | #5001 | 5’act aag agc tcC AGT TAA GTA TCC AAA CAA CCA AAC AAC TGG TAA ACC Act taa gct ctc cga aga cag tg 3‘ |
| SV SRSF7(4x) TT versus GT (15.2) delvpuenv-eGFP | #5038 | 5’ ACT AAG AGC TCC AGT TAA GTA TCC AAA CAA CCA AAC AAC TGG TAA GCC Act taa gct ctc cga aga cag tg 3’ |
| SV SRSF7(4x) AT versus GT (10.4) delvpuenv-eGFP | #5009 | 5‘ act aag agc tcC AGA TAA GTA TCC AAA CAA CCA AAC AAC TGG TAG ACC Act taa gct ctc cga aga cag tg 3‘ |
| SV SRSF7(4x) AT versus GT (12.2) delvpuenv-eGFP | #5002 | 5’act aag agc tcC AGA TAA GTA TCC AAA CAA CCA AAC AAC TGG TAA ACC Act taa gct ctc cga aga cag tg 3‘ |
| SV SRSF7(4x) AT versus GT (15.2) delvpuenv-eGFP | #5039 | 5’ ACT AAG AGC TCC AGA TAA GTA TCC AAA CAA CCA AAC AAC TGG TAA GCC Act taa gct ctc cga aga cag tg 3’ |
| SV SRSF7(4x) CT versus GT (10.4) delvpuenv-eGFP | #5010 | 5‘ act aag agc tcC AGC TAA GTA TCC AAA CAA CCA AAC AAC TGG TAG ACC Act taa gct ctc cga aga cag tg 3‘ |
| SV SRSF7(4x) CT versus GT (12.2) delvpuenv-eGFP | #5003 | 5’act aag agc tcC AGC TAA GTA TCC AAA CAA CCA AAC AAC TGG TAA ACC Act taa gct ctc cga aga cag tg 3‘ |
| SV SRSF7(4x) CT versus GT (15.2) delvpuenv-eGFP | #5040 | 5’ ACT AAG AGC TCC AGC TAA GTA TCC AAA CAA CCA AAC AAC TGG TAA GCC Act taa gct ctc cga aga cag tg 3’ |
| SV SRSF7(4x) GC versus TT delvpuenv-eGFP | #5049 | 5’ ACT AAG AGC TCC AGG CAA GTA TCC AAA CAA CCA AAC AAC AGT TAA GTA Tct taa gct ctc cga aga cag tg 3’ |
| SV SRSF7(4x) TT versus GC delvpuenv-eGFP | #5050 | 5’ ACT AAG AGC TCC AGT TAA GTA TCC AAA CAA CCA AAC AAC AGG CAA GTA Tct taa gct ctc cga aga cag tg 3’ |
| SV SRSF7(4x) GC versus AT delvpuenv-eGFP | #5051 | 5’ ACT AAG AGC TCC AGG CAA GTA TCC AAA CAA CCA AAC AAC AGA TAA GTA Tct taa gct ctc cga aga cag tg 3’ |
| SV SRSF7(4x) TT versus AT delvpuenv-eGFP | #5052 | 5’ ACT AAG AGC TCC AGT TAA GTA TCC AAA CAA CCA AAC AAC AGA TAA GTA Tct taa gct ctc cga aga cag tg 3’ |
| SV SRSF7(4x) AT versus GC delvpuenv-eGFP | #5053 | 5’ ACT AAG AGC TCC AGA TAA GTA TCC AAA CAA CCA AAC AAC AGG CAA GTA Tct taa gct ctc cga aga cag tg 3’ |
| SV SRSF7(4x) AT versus TT delvpuenv-eGFP | #5054 | 5’ ACT AAG AGC TCC AGA TAA GTA TCC AAA CAA CCA AAC AAC AGT TAA GTA Tct taa gct ctc cga aga cag tg 3’ |
| SV SRSF7(4x) *FANCC* GT delvpuenv-eGFP | #4389 | 5‘ att aat gag ctc atG GTA AGT Agc tta agc tct ccg aag aca g 3‘ |
| SV SRSF7(4x) *FANCC* c.165 +1G>T (18.7) delvpuenv-eGFP | #4390 | 5‘ att aat gag ctc atG TTA AGT Agc tta agc tct ccg aag aca g 3‘ |
| SV SRSF7(4x) *FANCC* c.165 +1G>T (22.5) delvpuenv-eGFP | #4590 | 5‘ att aat gag ctc CAG tTA AGT Agc tta agc tct ccg aag aca g 3‘ |
| SV SRSF7(4x) *FANCC* c.165 +1G>T (20.8) delvpuenv-eGFP | #4650 | 5‘ att aat gag ctc AAG tTA AGT Agc tta agc tct ccg aag aca g 3‘ |
| SV SRSF7(4x) *FANCC* c.165 +1G>T (18.9) delvpuenv-eGFP | #4587 | 5‘ att aat gag ctc CtG TTA AGT Agc tta agc tct ccg aag aca g 3‘ |
| SV SRSF7(4x) *FANCC* c.165 +1G>T (19.0) delvpuenv-eGFP | #4276 | 5‘ att aat gag ctc CAG tTA AGc Agc tta agc tct ccg aag aca g 3‘ |
| SV SRSF7(4x) *FANCC* c.165 +1G>T (17.3) delvpuenv-eGFP | #4589 | 5‘ att aat gag ctc AAG tTA AGc Agc tta agc tct ccg aag aca g 3‘ |
| SV SRSF7(4x) *FANCC* c.165 +1G>T (15.4) delvpuenv-eGFP | #4649 | 5‘ att aat gag ctc CtG TTA AGC Agc tta agc tct ccg aag aca g 3‘ |
| SV SRSF7(4x) *FANCC* c.165 +1G>T (15.2) delvpuenv-eGFP | #4588 | 5‘ att aat gag ctc AtG TTA AGC Agc tta agc tct ccg aag aca g 3‘ |
| Reverse | #640 | 5’ CAA TAC TAC TTC TTG TGG GTT GG 3’ |
| Designer Exon Splicing Reporter | | |
| Forward | | |
| Designer Exon 7 SRSF7 (2x) c1c3 | #4705 | 5’ AAC AAC CTT AGG AGA CAA CGA TTG ATC GAC TAC TTA AGA GAC AAC GAT TGA TCG ACT AAC CGG TCC GGT AAT GCC 3’ |
| Designer Exon 7 SRSF7 (2x) c1c3 -8/-7 GT (AA CGTACG CAG ttaagtgt) | #5123 | 5’ AAC AAC GTA CGC AGT TAA GTG TCC AAA CAA CCA AAC AAC C 3’ |
| Designer Exon 7 SRSF7 (2x) c1c3 -8/-7 CT (AA CCTACG CAG ttaagtgt) | #5247 | 5’ TGA CAC TCG AGC CAA ACA ACC AAA CAA CCA AAC AAC CAA ACA ACC AAA CAA CCT ACG CAG TTA AGT GTC CAA ACA A 3’ |
| Designer Exon 7 SRSF7 (2x) c1c3 -8/-7 GT CANC Mut (1x) | #6025 | 5‘ TGA CAC TCG AGC CAA ACA ACC AAA CAA CCA AAC AAC CAA ACA ACC AAA AAA CGT ACG CAG TTA AGT GTC C 3’ |
| Designer Exon 7 SRSF7 (2x) c1c3 -8/-7 GT CANC Mut (2x) | #6026 | 5’ TGA CAC TCG AGC CAA ACA ACC AAA CAA CCA AAC AAC CAA ATA ACC AAA AAA CGT ACG CAG TTA AGT GTC C 3’ |
| Designer Exon 7 SRSF7 (2x) c1c3 -8/-7 CT CANC Mut (1x) | #6027 | 5’ TGA CAC TCG AGC CAA ACA ACC AAA CAA CCA AAC AAC CAA ACA ACC AAA AAA CCT ACG CAG TTA AGT GTC C 3’ |
| Designer Exon 7 SRSF7 (2x) c1c3 -8/-7 CT CANC Mut (2x) | #6028 | 5’ TGA CAC TCG AGC CAA ACA ACC AAA CAA CCA AAC AAC CAA ATA ACC AAA AAA CCT ACG CAG TTA AGT GTC C 3’ |
| Reverse | #2620 | 5’ GAT CCC GGG AAA GAT TTG TTG TCA CAT ACA GAA G 3’ |
| Reverse | #2649 | 5’ TCC ACC ACC GTC TTC TTT AG 3’ |
