# Supplementary material for: S40 Turbo replacement procedure
Source: HighWire-hosted journal article supplement (doi:10.1101/gr.235861.118), 2011-02-24
Supplement: Supplemental_Table_S2.docx [file Supplemental_Table_S2.docx]

Supplemental Table S2 (A): Primers used for semi-quantitative RT-PCR

| Target RNA | Primer | Sequence |
| --- | --- | --- |
| SV-env/eGFP | #3210 | 5’-TGA GGA GGC TTT TTT GGA GG-3’ |
|  | #3211 | 5’-TTC ACT AAT CGA ATG GAT CTG TC-3' |
| GH1 | #1224 | 5’-TCT TCC AGC CTC CCA TCA GCG TTT GG-3' |
|  | #1225 | 5’-CAA CAG AAA TCC AAC CTA GAG CTG CT-3' |
| Designer Exon | #2648 | 5’-AGT GAT TCA GAA CCG TCA AG-3’ |
|  | #2649 | 5’-TCC ACC ACC GTC TTC TTT AG-3’ |

Supplemental Table S2 (B): Oligonucleotides used for RNA Affinity Chromatography assay

| Primer | Sequence |
| --- | --- |
| **#4825 T7** | 5’-TAATACGACTCACTATAGG-3’ |
| **#5986 GT** | 5’-CCAATAGGATACTTACCTGCCAATAGGACATGGGTGATCCTCATGTCCTATAGTGAGTCGTATTA-3’ |
| **#5987 CT** | 5’-CCAATAGGATACTTAGCTGCCAATAGGACATGGGTGATCCTCATGTCCTATAGTGAGTCGTATTA-3’ |
