# Supplementary material for: S40 Turbo replacement procedure
Source: HighWire-hosted journal article supplement (doi:10.1101/gr.235861.118), 2011-02-24
Supplement: Supplemental_Table_S3.xlsx [file Supplemental_Table_S3.xlsx]

## Sheet: HBond score table
Sequence	HBond score
AAAGTAAAAAA	9.4
AAAGTAAACAA	9.4
AAAGTAAAGAA	9.4
AAAGTAAATAA	10.8
AAAGTAACAAA	9.4
AAAGTAACCAA	9.4
AAAGTAACGAA	9.4
AAAGTAACTAA	10.8
AAAGTAAGAAA	12.6
AAAGTAAGCAA	12.6
AAAGTAAGGAA	12.6
AAAGTAAGTAA	16.1
AAAGTAATAAA	9.4
AAAGTAATCAA	9.4
AAAGTAATGAA	9.4
AAAGTAATTAA	10.8
AAAGTACAAAA	7.6
AAAGTACACAA	7.6
AAAGTACAGAA	7.6
AAAGTACATAA	7.6
AAAGTACCAAA	7.6
AAAGTACCCAA	7.6
AAAGTACCGAA	7.6
AAAGTACCTAA	7.6
AAAGTACGAAA	9.3
AAAGTACGCAA	9.3
AAAGTACGGAA	9.3
AAAGTACGTAA	12.8
AAAGTACTAAA	7.6
AAAGTACTCAA	7.6
AAAGTACTGAA	7.6
AAAGTACTTAA	7.6
AAAGTAGAAAA	7.6
AAAGTAGACAA	7.6
AAAGTAGAGAA	7.6
AAAGTAGATAA	7.6
AAAGTAGCAAA	7.6
AAAGTAGCCAA	7.6
AAAGTAGCGAA	7.6
AAAGTAGCTAA	7.6
AAAGTAGGAAA	9.5
AAAGTAGGCAA	9.5
AAAGTAGGGAA	9.5
AAAGTAGGTAA	13
AAAGTAGTAAA	7.6
AAAGTAGTCAA	7.6
AAAGTAGTGAA	7.6
AAAGTAGTTAA	7.6
AAAGTATAAAA	7.6
AAAGTATACAA	7.6
AAAGTATAGAA	7.6
AAAGTATATAA	7.6
AAAGTATCAAA	7.6
AAAGTATCCAA	7.6
AAAGTATCGAA	7.6
AAAGTATCTAA	7.6
AAAGTATGAAA	9.3
AAAGTATGCAA	9.3
AAAGTATGGAA	9.3
AAAGTATGTAA	12.8
AAAGTATTAAA	7.6
AAAGTATTCAA	7.6
AAAGTATTGAA	7.6
AAAGTATTTAA	7.6
AAAGTCAAAAA	2.3
AAAGTCAACAA	2.3
AAAGTCAAGAA	2.3
AAAGTCAATAA	3.7
AAAGTCACAAA	2.3
AAAGTCACCAA	2.3
AAAGTCACGAA	2.3
AAAGTCACTAA	3.7
AAAGTCAGAAA	5.5
AAAGTCAGCAA	5.5
AAAGTCAGGAA	5.5
AAAGTCAGTAA	9
AAAGTCATAAA	2.3
AAAGTCATCAA	2.3
AAAGTCATGAA	2.3
AAAGTCATTAA	3.7
AAAGTCCAAAA	2.2
AAAGTCCACAA	2.2
AAAGTCCAGAA	2.2
AAAGTCCATAA	3.7
AAAGTCCCAAA	2.2
AAAGTCCCCAA	2.2
AAAGTCCCGAA	2.2
AAAGTCCCTAA	3.7
AAAGTCCGAAA	3.2
AAAGTCCGCAA	3.2
AAAGTCCGGAA	3.2
AAAGTCCGTAA	6.7
AAAGTCCTAAA	2.2
AAAGTCCTCAA	2.2
AAAGTCCTGAA	2.2
AAAGTCCTTAA	3.7
AAAGTCGAAAA	2.2
AAAGTCGACAA	2.2
AAAGTCGAGAA	2.2
AAAGTCGATAA	3.7
AAAGTCGCAAA	2.2
AAAGTCGCCAA	2.2
AAAGTCGCGAA	2.2
AAAGTCGCTAA	3.7
AAAGTCGGAAA	3.2
AAAGTCGGCAA	3.2
AAAGTCGGGAA	3.2
AAAGTCGGTAA	6.7
AAAGTCGTAAA	2.2
AAAGTCGTCAA	2.2
AAAGTCGTGAA	2.2
AAAGTCGTTAA	3.7
AAAGTCTAAAA	2.2
AAAGTCTACAA	2.2
AAAGTCTAGAA	2.2
AAAGTCTATAA	3.7
AAAGTCTCAAA	2.2
AAAGTCTCCAA	2.2
AAAGTCTCGAA	2.2
AAAGTCTCTAA	3.7
AAAGTCTGAAA	3.2
AAAGTCTGCAA	3.2
AAAGTCTGGAA	3.2
AAAGTCTGTAA	6.7
AAAGTCTTAAA	2.2
AAAGTCTTCAA	2.2
AAAGTCTTGAA	2.2
AAAGTCTTTAA	3.7
AAAGTGAAAAA	5.5
AAAGTGAACAA	5.5
AAAGTGAAGAA	5.5
AAAGTGAATAA	6.9
AAAGTGACAAA	5.5
AAAGTGACCAA	5.5
AAAGTGACGAA	5.5
AAAGTGACTAA	6.9
AAAGTGAGAAA	10.7
AAAGTGAGCAA	10.7
AAAGTGAGGAA	10.7
AAAGTGAGTAA	14.2
AAAGTGATAAA	5.5
AAAGTGATCAA	5.5
AAAGTGATGAA	5.5
AAAGTGATTAA	6.9
AAAGTGCAAAA	4.9
AAAGTGCACAA	4.9
AAAGTGCAGAA	4.9
AAAGTGCATAA	4.9
AAAGTGCCAAA	4.9
AAAGTGCCCAA	4.9
AAAGTGCCGAA	4.9
AAAGTGCCTAA	4.9
AAAGTGCGAAA	5.4
AAAGTGCGCAA	5.4
AAAGTGCGGAA	5.4
AAAGTGCGTAA	8.9
AAAGTGCTAAA	4.9
AAAGTGCTCAA	4.9
AAAGTGCTGAA	4.9
AAAGTGCTTAA	4.9
AAAGTGGAAAA	4.9
AAAGTGGACAA	4.9
AAAGTGGAGAA	4.9
AAAGTGGATAA	4.9
AAAGTGGCAAA	4.9
AAAGTGGCCAA	4.9
AAAGTGGCGAA	4.9
AAAGTGGCTAA	4.9
AAAGTGGGAAA	6.2
AAAGTGGGCAA	6.2
AAAGTGGGGAA	6.2
AAAGTGGGTAA	9.7
AAAGTGGTAAA	4.9
AAAGTGGTCAA	4.9
AAAGTGGTGAA	4.9
AAAGTGGTTAA	4.9
AAAGTGTAAAA	4.9
AAAGTGTACAA	4.9
AAAGTGTAGAA	4.9
AAAGTGTATAA	4.9
AAAGTGTCAAA	4.9
AAAGTGTCCAA	4.9
AAAGTGTCGAA	4.9
AAAGTGTCTAA	4.9
AAAGTGTGAAA	5.4
AAAGTGTGCAA	5.4
AAAGTGTGGAA	5.4
AAAGTGTGTAA	8.9
AAAGTGTTAAA	4.9
AAAGTGTTCAA	4.9
AAAGTGTTGAA	4.9
AAAGTGTTTAA	4.9
AAAGTTAAAAA	2.3
AAAGTTAACAA	2.3
AAAGTTAAGAA	2.3
AAAGTTAATAA	3.7
AAAGTTACAAA	2.3
AAAGTTACCAA	2.3
AAAGTTACGAA	2.3
AAAGTTACTAA	3.7
AAAGTTAGAAA	5.5
AAAGTTAGCAA	5.5
AAAGTTAGGAA	5.5
AAAGTTAGTAA	9
AAAGTTATAAA	2.3
AAAGTTATCAA	2.3
AAAGTTATGAA	2.3
AAAGTTATTAA	3.7
AAAGTTCAAAA	2.2
AAAGTTCACAA	2.2
AAAGTTCAGAA	2.2
AAAGTTCATAA	3.7
AAAGTTCCAAA	2.2
AAAGTTCCCAA	2.2
AAAGTTCCGAA	2.2
AAAGTTCCTAA	3.7
AAAGTTCGAAA	3.2
AAAGTTCGCAA	3.2
AAAGTTCGGAA	3.2
AAAGTTCGTAA	6.7
AAAGTTCTAAA	2.2
AAAGTTCTCAA	2.2
AAAGTTCTGAA	2.2
AAAGTTCTTAA	3.7
AAAGTTGAAAA	2.2
AAAGTTGACAA	2.2
AAAGTTGAGAA	2.2
AAAGTTGATAA	3.7
AAAGTTGCAAA	2.2
AAAGTTGCCAA	2.2
AAAGTTGCGAA	2.2
AAAGTTGCTAA	3.7
AAAGTTGGAAA	3.2
AAAGTTGGCAA	3.2
AAAGTTGGGAA	3.2
AAAGTTGGTAA	6.7
AAAGTTGTAAA	2.2
AAAGTTGTCAA	2.2
AAAGTTGTGAA	2.2
AAAGTTGTTAA	3.7
AAAGTTTAAAA	2.2
AAAGTTTACAA	2.2
AAAGTTTAGAA	2.2
AAAGTTTATAA	3.7
AAAGTTTCAAA	2.2
AAAGTTTCCAA	2.2
AAAGTTTCGAA	2.2
AAAGTTTCTAA	3.7
AAAGTTTGAAA	3.2
AAAGTTTGCAA	3.2
AAAGTTTGGAA	3.2
AAAGTTTGTAA	6.7
AAAGTTTTAAA	2.2
AAAGTTTTCAA	2.2
AAAGTTTTGAA	2.2
AAAGTTTTTAA	3.7
AACGTAAAAAA	9.4
AACGTAAACAA	9.4
AACGTAAAGAA	9.4
AACGTAAATAA	10.8
AACGTAACAAA	9.4
AACGTAACCAA	9.4
AACGTAACGAA	9.4
AACGTAACTAA	10.8
AACGTAAGAAA	12.6
AACGTAAGCAA	12.6
AACGTAAGGAA	12.6
AACGTAAGTAA	16.1
AACGTAATAAA	9.4
AACGTAATCAA	9.4
AACGTAATGAA	9.4
AACGTAATTAA	10.8
AACGTACAAAA	7.6
AACGTACACAA	7.6
AACGTACAGAA	7.6
AACGTACATAA	7.6
AACGTACCAAA	7.6
AACGTACCCAA	7.6
AACGTACCGAA	7.6
AACGTACCTAA	7.6
AACGTACGAAA	9.3
AACGTACGCAA	9.3
AACGTACGGAA	9.3
AACGTACGTAA	12.8
AACGTACTAAA	7.6
AACGTACTCAA	7.6
AACGTACTGAA	7.6
AACGTACTTAA	7.6
AACGTAGAAAA	7.6
AACGTAGACAA	7.6
AACGTAGAGAA	7.6
AACGTAGATAA	7.6
AACGTAGCAAA	7.6
AACGTAGCCAA	7.6
AACGTAGCGAA	7.6
AACGTAGCTAA	7.6
AACGTAGGAAA	9.5
AACGTAGGCAA	9.5
AACGTAGGGAA	9.5
AACGTAGGTAA	13
AACGTAGTAAA	7.6
AACGTAGTCAA	7.6
AACGTAGTGAA	7.6
AACGTAGTTAA	7.6
AACGTATAAAA	7.6
AACGTATACAA	7.6
AACGTATAGAA	7.6
AACGTATATAA	7.6
AACGTATCAAA	7.6
AACGTATCCAA	7.6
AACGTATCGAA	7.6
AACGTATCTAA	7.6
AACGTATGAAA	9.3
AACGTATGCAA	9.3
AACGTATGGAA	9.3
AACGTATGTAA	12.8
AACGTATTAAA	7.6
AACGTATTCAA	7.6
AACGTATTGAA	7.6
AACGTATTTAA	7.6
AACGTCAAAAA	2.3
AACGTCAACAA	2.3
AACGTCAAGAA	2.3
AACGTCAATAA	3.7
AACGTCACAAA	2.3
AACGTCACCAA	2.3
AACGTCACGAA	2.3
AACGTCACTAA	3.7
AACGTCAGAAA	5.5
AACGTCAGCAA	5.5
AACGTCAGGAA	5.5
AACGTCAGTAA	9
AACGTCATAAA	2.3
AACGTCATCAA	2.3
AACGTCATGAA	2.3
AACGTCATTAA	3.7
AACGTCCAAAA	2.2
AACGTCCACAA	2.2
AACGTCCAGAA	2.2
AACGTCCATAA	3.7
AACGTCCCAAA	2.2
AACGTCCCCAA	2.2
AACGTCCCGAA	2.2
AACGTCCCTAA	3.7
AACGTCCGAAA	3.2
AACGTCCGCAA	3.2
AACGTCCGGAA	3.2
AACGTCCGTAA	6.7
AACGTCCTAAA	2.2
AACGTCCTCAA	2.2
AACGTCCTGAA	2.2
AACGTCCTTAA	3.7
AACGTCGAAAA	2.2
AACGTCGACAA	2.2
AACGTCGAGAA	2.2
AACGTCGATAA	3.7
AACGTCGCAAA	2.2
AACGTCGCCAA	2.2
AACGTCGCGAA	2.2
AACGTCGCTAA	3.7
AACGTCGGAAA	3.2
AACGTCGGCAA	3.2
AACGTCGGGAA	3.2
AACGTCGGTAA	6.7
AACGTCGTAAA	2.2
AACGTCGTCAA	2.2
AACGTCGTGAA	2.2
AACGTCGTTAA	3.7
AACGTCTAAAA	2.2
AACGTCTACAA	2.2
AACGTCTAGAA	2.2
AACGTCTATAA	3.7
AACGTCTCAAA	2.2
AACGTCTCCAA	2.2
AACGTCTCGAA	2.2
AACGTCTCTAA	3.7
AACGTCTGAAA	3.2
AACGTCTGCAA	3.2
AACGTCTGGAA	3.2
AACGTCTGTAA	6.7
AACGTCTTAAA	2.2
AACGTCTTCAA	2.2
AACGTCTTGAA	2.2
AACGTCTTTAA	3.7
AACGTGAAAAA	5.5
AACGTGAACAA	5.5
AACGTGAAGAA	5.5
AACGTGAATAA	6.9
AACGTGACAAA	5.5
AACGTGACCAA	5.5
AACGTGACGAA	5.5
AACGTGACTAA	6.9
AACGTGAGAAA	10.7
AACGTGAGCAA	10.7
AACGTGAGGAA	10.7
AACGTGAGTAA	14.2
AACGTGATAAA	5.5
AACGTGATCAA	5.5
AACGTGATGAA	5.5
AACGTGATTAA	6.9
AACGTGCAAAA	4.9
AACGTGCACAA	4.9
AACGTGCAGAA	4.9
AACGTGCATAA	4.9
AACGTGCCAAA	4.9
AACGTGCCCAA	4.9
AACGTGCCGAA	4.9
AACGTGCCTAA	4.9
AACGTGCGAAA	5.4
AACGTGCGCAA	5.4
AACGTGCGGAA	5.4
AACGTGCGTAA	8.9
AACGTGCTAAA	4.9
AACGTGCTCAA	4.9
AACGTGCTGAA	4.9
AACGTGCTTAA	4.9
AACGTGGAAAA	4.9
AACGTGGACAA	4.9
AACGTGGAGAA	4.9
AACGTGGATAA	4.9
AACGTGGCAAA	4.9
AACGTGGCCAA	4.9
AACGTGGCGAA	4.9
AACGTGGCTAA	4.9
AACGTGGGAAA	6.2
AACGTGGGCAA	6.2
AACGTGGGGAA	6.2
AACGTGGGTAA	9.7
AACGTGGTAAA	4.9
AACGTGGTCAA	4.9
AACGTGGTGAA	4.9
AACGTGGTTAA	4.9
AACGTGTAAAA	4.9
AACGTGTACAA	4.9
AACGTGTAGAA	4.9
AACGTGTATAA	4.9
AACGTGTCAAA	4.9
AACGTGTCCAA	4.9
AACGTGTCGAA	4.9
AACGTGTCTAA	4.9
AACGTGTGAAA	5.4
AACGTGTGCAA	5.4
AACGTGTGGAA	5.4
AACGTGTGTAA	8.9
AACGTGTTAAA	4.9
AACGTGTTCAA	4.9
AACGTGTTGAA	4.9
AACGTGTTTAA	4.9
AACGTTAAAAA	2.3
AACGTTAACAA	2.3
AACGTTAAGAA	2.3
AACGTTAATAA	3.7
AACGTTACAAA	2.3
AACGTTACCAA	2.3
AACGTTACGAA	2.3
AACGTTACTAA	3.7
AACGTTAGAAA	5.5
AACGTTAGCAA	5.5
AACGTTAGGAA	5.5
AACGTTAGTAA	9
AACGTTATAAA	2.3
AACGTTATCAA	2.3
AACGTTATGAA	2.3
AACGTTATTAA	3.7
AACGTTCAAAA	2.2
AACGTTCACAA	2.2
AACGTTCAGAA	2.2
AACGTTCATAA	3.7
AACGTTCCAAA	2.2
AACGTTCCCAA	2.2
AACGTTCCGAA	2.2
AACGTTCCTAA	3.7
AACGTTCGAAA	3.2
AACGTTCGCAA	3.2
AACGTTCGGAA	3.2
AACGTTCGTAA	6.7
AACGTTCTAAA	2.2
AACGTTCTCAA	2.2
AACGTTCTGAA	2.2
AACGTTCTTAA	3.7
AACGTTGAAAA	2.2
AACGTTGACAA	2.2
AACGTTGAGAA	2.2
AACGTTGATAA	3.7
AACGTTGCAAA	2.2
AACGTTGCCAA	2.2
AACGTTGCGAA	2.2
AACGTTGCTAA	3.7
AACGTTGGAAA	3.2
AACGTTGGCAA	3.2
AACGTTGGGAA	3.2
AACGTTGGTAA	6.7
AACGTTGTAAA	2.2
AACGTTGTCAA	2.2
AACGTTGTGAA	2.2
AACGTTGTTAA	3.7
AACGTTTAAAA	2.2
AACGTTTACAA	2.2
AACGTTTAGAA	2.2
AACGTTTATAA	3.7
AACGTTTCAAA	2.2
AACGTTTCCAA	2.2
AACGTTTCGAA	2.2
AACGTTTCTAA	3.7
AACGTTTGAAA	3.2
AACGTTTGCAA	3.2
AACGTTTGGAA	3.2
AACGTTTGTAA	6.7
AACGTTTTAAA	2.2
AACGTTTTCAA	2.2
AACGTTTTGAA	2.2
AACGTTTTTAA	3.7
AAGGTAAAAAA	14.1
AAGGTAAACAA	14.1
AAGGTAAAGAA	14.1
AAGGTAAATAA	15.5
AAGGTAACAAA	14.1
AAGGTAACCAA	14.1
AAGGTAACGAA	14.1
AAGGTAACTAA	15.5
AAGGTAAGAAA	17.3
AAGGTAAGCAA	17.3
AAGGTAAGGAA	17.3
AAGGTAAGTAA	20.8
AAGGTAATAAA	14.1
AAGGTAATCAA	14.1
AAGGTAATGAA	14.1
AAGGTAATTAA	15.5
AAGGTACAAAA	12.3
AAGGTACACAA	12.3
AAGGTACAGAA	12.3
AAGGTACATAA	12.3
AAGGTACCAAA	12.3
AAGGTACCCAA	12.3
AAGGTACCGAA	12.3
AAGGTACCTAA	12.3
AAGGTACGAAA	14
AAGGTACGCAA	14
AAGGTACGGAA	14
AAGGTACGTAA	17.5
AAGGTACTAAA	12.3
AAGGTACTCAA	12.3
AAGGTACTGAA	12.3
AAGGTACTTAA	12.3
AAGGTAGAAAA	12.3
AAGGTAGACAA	12.3
AAGGTAGAGAA	12.3
AAGGTAGATAA	12.3
AAGGTAGCAAA	12.3
AAGGTAGCCAA	12.3
AAGGTAGCGAA	12.3
AAGGTAGCTAA	12.3
AAGGTAGGAAA	14.2
AAGGTAGGCAA	14.2
AAGGTAGGGAA	14.2
AAGGTAGGTAA	17.7
AAGGTAGTAAA	12.3
AAGGTAGTCAA	12.3
AAGGTAGTGAA	12.3
AAGGTAGTTAA	12.3
AAGGTATAAAA	12.3
AAGGTATACAA	12.3
AAGGTATAGAA	12.3
AAGGTATATAA	12.3
AAGGTATCAAA	12.3
AAGGTATCCAA	12.3
AAGGTATCGAA	12.3
AAGGTATCTAA	12.3
AAGGTATGAAA	14
AAGGTATGCAA	14
AAGGTATGGAA	14
AAGGTATGTAA	17.5
AAGGTATTAAA	12.3
AAGGTATTCAA	12.3
AAGGTATTGAA	12.3
AAGGTATTTAA	12.3
AAGGTCAAAAA	10.2
AAGGTCAACAA	10.2
AAGGTCAAGAA	10.2
AAGGTCAATAA	11.6
AAGGTCACAAA	10.2
AAGGTCACCAA	10.2
AAGGTCACGAA	10.2
AAGGTCACTAA	11.6
AAGGTCAGAAA	13.4
AAGGTCAGCAA	13.4
AAGGTCAGGAA	13.4
AAGGTCAGTAA	16.9
AAGGTCATAAA	10.2
AAGGTCATCAA	10.2
AAGGTCATGAA	10.2
AAGGTCATTAA	11.6
AAGGTCCAAAA	10.1
AAGGTCCACAA	10.1
AAGGTCCAGAA	10.1
AAGGTCCATAA	10.1
AAGGTCCCAAA	10.1
AAGGTCCCCAA	10.1
AAGGTCCCGAA	10.1
AAGGTCCCTAA	10.1
AAGGTCCGAAA	10.1
AAGGTCCGCAA	10.1
AAGGTCCGGAA	10.1
AAGGTCCGTAA	13.2
AAGGTCCTAAA	10.1
AAGGTCCTCAA	10.1
AAGGTCCTGAA	10.1
AAGGTCCTTAA	10.1
AAGGTCGAAAA	10.1
AAGGTCGACAA	10.1
AAGGTCGAGAA	10.1
AAGGTCGATAA	10.1
AAGGTCGCAAA	10.1
AAGGTCGCCAA	10.1
AAGGTCGCGAA	10.1
AAGGTCGCTAA	10.1
AAGGTCGGAAA	10.1
AAGGTCGGCAA	10.1
AAGGTCGGGAA	10.1
AAGGTCGGTAA	13.4
AAGGTCGTAAA	10.1
AAGGTCGTCAA	10.1
AAGGTCGTGAA	10.1
AAGGTCGTTAA	10.1
AAGGTCTAAAA	10.1
AAGGTCTACAA	10.1
AAGGTCTAGAA	10.1
AAGGTCTATAA	10.1
AAGGTCTCAAA	10.1
AAGGTCTCCAA	10.1
AAGGTCTCGAA	10.1
AAGGTCTCTAA	10.1
AAGGTCTGAAA	10.1
AAGGTCTGCAA	10.1
AAGGTCTGGAA	10.1
AAGGTCTGTAA	13.2
AAGGTCTTAAA	10.1
AAGGTCTTCAA	10.1
AAGGTCTTGAA	10.1
AAGGTCTTTAA	10.1
AAGGTGAAAAA	10.7
AAGGTGAACAA	10.7
AAGGTGAAGAA	10.7
AAGGTGAATAA	12.1
AAGGTGACAAA	10.7
AAGGTGACCAA	10.7
AAGGTGACGAA	10.7
AAGGTGACTAA	12.1
AAGGTGAGAAA	15.9
AAGGTGAGCAA	15.9
AAGGTGAGGAA	15.9
AAGGTGAGTAA	19.4
AAGGTGATAAA	10.7
AAGGTGATCAA	10.7
AAGGTGATGAA	10.7
AAGGTGATTAA	12.1
AAGGTGCAAAA	10.1
AAGGTGCACAA	10.1
AAGGTGCAGAA	10.1
AAGGTGCATAA	10.1
AAGGTGCCAAA	10.1
AAGGTGCCCAA	10.1
AAGGTGCCGAA	10.1
AAGGTGCCTAA	10.1
AAGGTGCGAAA	10.6
AAGGTGCGCAA	10.6
AAGGTGCGGAA	10.6
AAGGTGCGTAA	14.1
AAGGTGCTAAA	10.1
AAGGTGCTCAA	10.1
AAGGTGCTGAA	10.1
AAGGTGCTTAA	10.1
AAGGTGGAAAA	10.1
AAGGTGGACAA	10.1
AAGGTGGAGAA	10.1
AAGGTGGATAA	10.1
AAGGTGGCAAA	10.1
AAGGTGGCCAA	10.1
AAGGTGGCGAA	10.1
AAGGTGGCTAA	10.1
AAGGTGGGAAA	11.4
AAGGTGGGCAA	11.4
AAGGTGGGGAA	11.4
AAGGTGGGTAA	15.8
AAGGTGGTAAA	10.1
AAGGTGGTCAA	10.1
AAGGTGGTGAA	10.1
AAGGTGGTTAA	10.1
AAGGTGTAAAA	10.1
AAGGTGTACAA	10.1
AAGGTGTAGAA	10.1
AAGGTGTATAA	10.1
AAGGTGTCAAA	10.1
AAGGTGTCCAA	10.1
AAGGTGTCGAA	10.1
AAGGTGTCTAA	10.1
AAGGTGTGAAA	10.6
AAGGTGTGCAA	10.6
AAGGTGTGGAA	10.6
AAGGTGTGTAA	14.1
AAGGTGTTAAA	10.1
AAGGTGTTCAA	10.1
AAGGTGTTGAA	10.1
AAGGTGTTTAA	10.1
AAGGTTAAAAA	10.2
AAGGTTAACAA	10.2
AAGGTTAAGAA	10.2
AAGGTTAATAA	11.6
AAGGTTACAAA	10.2
AAGGTTACCAA	10.2
AAGGTTACGAA	10.2
AAGGTTACTAA	11.6
AAGGTTAGAAA	13.4
AAGGTTAGCAA	13.4
AAGGTTAGGAA	13.4
AAGGTTAGTAA	16.9
AAGGTTATAAA	10.2
AAGGTTATCAA	10.2
AAGGTTATGAA	10.2
AAGGTTATTAA	11.6
AAGGTTCAAAA	10.1
AAGGTTCACAA	10.1
AAGGTTCAGAA	10.1
AAGGTTCATAA	10.1
AAGGTTCCAAA	10.1
AAGGTTCCCAA	10.1
AAGGTTCCGAA	10.1
AAGGTTCCTAA	10.1
AAGGTTCGAAA	10.1
AAGGTTCGCAA	10.1
AAGGTTCGGAA	10.1
AAGGTTCGTAA	13.2
AAGGTTCTAAA	10.1
AAGGTTCTCAA	10.1
AAGGTTCTGAA	10.1
AAGGTTCTTAA	10.1
AAGGTTGAAAA	10.1
AAGGTTGACAA	10.1
AAGGTTGAGAA	10.1
AAGGTTGATAA	10.1
AAGGTTGCAAA	10.1
AAGGTTGCCAA	10.1
AAGGTTGCGAA	10.1
AAGGTTGCTAA	10.1
AAGGTTGGAAA	10.1
AAGGTTGGCAA	10.1
AAGGTTGGGAA	10.1
AAGGTTGGTAA	13.4
AAGGTTGTAAA	10.1
AAGGTTGTCAA	10.1
AAGGTTGTGAA	10.1
AAGGTTGTTAA	10.1
AAGGTTTAAAA	10.1
AAGGTTTACAA	10.1
AAGGTTTAGAA	10.1
AAGGTTTATAA	10.1
AAGGTTTCAAA	10.1
AAGGTTTCCAA	10.1
AAGGTTTCGAA	10.1
AAGGTTTCTAA	10.1
AAGGTTTGAAA	10.1
AAGGTTTGCAA	10.1
AAGGTTTGGAA	10.1
AAGGTTTGTAA	13.2
AAGGTTTTAAA	10.1
AAGGTTTTCAA	10.1
AAGGTTTTGAA	10.1
AAGGTTTTTAA	10.1
AATGTAAAAAA	9.4
AATGTAAACAA	9.4
AATGTAAAGAA	9.4
AATGTAAATAA	10.8
AATGTAACAAA	9.4
AATGTAACCAA	9.4
AATGTAACGAA	9.4
AATGTAACTAA	10.8
AATGTAAGAAA	12.6
AATGTAAGCAA	12.6
AATGTAAGGAA	12.6
AATGTAAGTAA	16.1
AATGTAATAAA	9.4
AATGTAATCAA	9.4
AATGTAATGAA	9.4
AATGTAATTAA	10.8
AATGTACAAAA	7.6
AATGTACACAA	7.6
AATGTACAGAA	7.6
AATGTACATAA	7.6
AATGTACCAAA	7.6
AATGTACCCAA	7.6
AATGTACCGAA	7.6
AATGTACCTAA	7.6
AATGTACGAAA	9.3
AATGTACGCAA	9.3
AATGTACGGAA	9.3
AATGTACGTAA	12.8
AATGTACTAAA	7.6
AATGTACTCAA	7.6
AATGTACTGAA	7.6
AATGTACTTAA	7.6
AATGTAGAAAA	7.6
AATGTAGACAA	7.6
AATGTAGAGAA	7.6
AATGTAGATAA	7.6
AATGTAGCAAA	7.6
AATGTAGCCAA	7.6
AATGTAGCGAA	7.6
AATGTAGCTAA	7.6
AATGTAGGAAA	9.5
AATGTAGGCAA	9.5
AATGTAGGGAA	9.5
AATGTAGGTAA	13
AATGTAGTAAA	7.6
AATGTAGTCAA	7.6
AATGTAGTGAA	7.6
AATGTAGTTAA	7.6
AATGTATAAAA	7.6
AATGTATACAA	7.6
AATGTATAGAA	7.6
AATGTATATAA	7.6
AATGTATCAAA	7.6
AATGTATCCAA	7.6
AATGTATCGAA	7.6
AATGTATCTAA	7.6
AATGTATGAAA	9.3
AATGTATGCAA	9.3
AATGTATGGAA	9.3
AATGTATGTAA	12.8
AATGTATTAAA	7.6
AATGTATTCAA	7.6
AATGTATTGAA	7.6
AATGTATTTAA	7.6
AATGTCAAAAA	2.3
AATGTCAACAA	2.3
AATGTCAAGAA	2.3
AATGTCAATAA	3.7
AATGTCACAAA	2.3
AATGTCACCAA	2.3
AATGTCACGAA	2.3
AATGTCACTAA	3.7
AATGTCAGAAA	5.5
AATGTCAGCAA	5.5
AATGTCAGGAA	5.5
AATGTCAGTAA	9
AATGTCATAAA	2.3
AATGTCATCAA	2.3
AATGTCATGAA	2.3
AATGTCATTAA	3.7
AATGTCCAAAA	2.2
AATGTCCACAA	2.2
AATGTCCAGAA	2.2
AATGTCCATAA	3.7
AATGTCCCAAA	2.2
AATGTCCCCAA	2.2
AATGTCCCGAA	2.2
AATGTCCCTAA	3.7
AATGTCCGAAA	3.2
AATGTCCGCAA	3.2
AATGTCCGGAA	3.2
AATGTCCGTAA	6.7
AATGTCCTAAA	2.2
AATGTCCTCAA	2.2
AATGTCCTGAA	2.2
AATGTCCTTAA	3.7
AATGTCGAAAA	2.2
AATGTCGACAA	2.2
AATGTCGAGAA	2.2
AATGTCGATAA	3.7
AATGTCGCAAA	2.2
AATGTCGCCAA	2.2
AATGTCGCGAA	2.2
AATGTCGCTAA	3.7
AATGTCGGAAA	3.2
AATGTCGGCAA	3.2
AATGTCGGGAA	3.2
AATGTCGGTAA	6.7
AATGTCGTAAA	2.2
AATGTCGTCAA	2.2
AATGTCGTGAA	2.2
AATGTCGTTAA	3.7
AATGTCTAAAA	2.2
AATGTCTACAA	2.2
AATGTCTAGAA	2.2
AATGTCTATAA	3.7
AATGTCTCAAA	2.2
AATGTCTCCAA	2.2
AATGTCTCGAA	2.2
AATGTCTCTAA	3.7
AATGTCTGAAA	3.2
AATGTCTGCAA	3.2
AATGTCTGGAA	3.2
AATGTCTGTAA	6.7
AATGTCTTAAA	2.2
AATGTCTTCAA	2.2
AATGTCTTGAA	2.2
AATGTCTTTAA	3.7
AATGTGAAAAA	5.5
AATGTGAACAA	5.5
AATGTGAAGAA	5.5
AATGTGAATAA	6.9
AATGTGACAAA	5.5
AATGTGACCAA	5.5
AATGTGACGAA	5.5
AATGTGACTAA	6.9
AATGTGAGAAA	10.7
AATGTGAGCAA	10.7
AATGTGAGGAA	10.7
AATGTGAGTAA	14.2
AATGTGATAAA	5.5
AATGTGATCAA	5.5
AATGTGATGAA	5.5
AATGTGATTAA	6.9
AATGTGCAAAA	4.9
AATGTGCACAA	4.9
AATGTGCAGAA	4.9
AATGTGCATAA	4.9
AATGTGCCAAA	4.9
AATGTGCCCAA	4.9
AATGTGCCGAA	4.9
AATGTGCCTAA	4.9
AATGTGCGAAA	5.4
AATGTGCGCAA	5.4
AATGTGCGGAA	5.4
AATGTGCGTAA	8.9
AATGTGCTAAA	4.9
AATGTGCTCAA	4.9
AATGTGCTGAA	4.9
AATGTGCTTAA	4.9
AATGTGGAAAA	4.9
AATGTGGACAA	4.9
AATGTGGAGAA	4.9
AATGTGGATAA	4.9
AATGTGGCAAA	4.9
AATGTGGCCAA	4.9
AATGTGGCGAA	4.9
AATGTGGCTAA	4.9
AATGTGGGAAA	6.2
AATGTGGGCAA	6.2
AATGTGGGGAA	6.2
AATGTGGGTAA	9.7
AATGTGGTAAA	4.9
AATGTGGTCAA	4.9
AATGTGGTGAA	4.9
AATGTGGTTAA	4.9
AATGTGTAAAA	4.9
AATGTGTACAA	4.9
AATGTGTAGAA	4.9
AATGTGTATAA	4.9
AATGTGTCAAA	4.9
AATGTGTCCAA	4.9
AATGTGTCGAA	4.9
AATGTGTCTAA	4.9
AATGTGTGAAA	5.4
AATGTGTGCAA	5.4
AATGTGTGGAA	5.4
AATGTGTGTAA	8.9
AATGTGTTAAA	4.9
AATGTGTTCAA	4.9
AATGTGTTGAA	4.9
AATGTGTTTAA	4.9
AATGTTAAAAA	2.3
AATGTTAACAA	2.3
AATGTTAAGAA	2.3
AATGTTAATAA	3.7
AATGTTACAAA	2.3
AATGTTACCAA	2.3
AATGTTACGAA	2.3
AATGTTACTAA	3.7
AATGTTAGAAA	5.5
AATGTTAGCAA	5.5
AATGTTAGGAA	5.5
AATGTTAGTAA	9
AATGTTATAAA	2.3
AATGTTATCAA	2.3
AATGTTATGAA	2.3
AATGTTATTAA	3.7
AATGTTCAAAA	2.2
AATGTTCACAA	2.2
AATGTTCAGAA	2.2
AATGTTCATAA	3.7
AATGTTCCAAA	2.2
AATGTTCCCAA	2.2
AATGTTCCGAA	2.2
AATGTTCCTAA	3.7
AATGTTCGAAA	3.2
AATGTTCGCAA	3.2
AATGTTCGGAA	3.2
AATGTTCGTAA	6.7
AATGTTCTAAA	2.2
AATGTTCTCAA	2.2
AATGTTCTGAA	2.2
AATGTTCTTAA	3.7
AATGTTGAAAA	2.2
AATGTTGACAA	2.2
AATGTTGAGAA	2.2
AATGTTGATAA	3.7
AATGTTGCAAA	2.2
AATGTTGCCAA	2.2
AATGTTGCGAA	2.2
AATGTTGCTAA	3.7
AATGTTGGAAA	3.2
AATGTTGGCAA	3.2
AATGTTGGGAA	3.2
AATGTTGGTAA	6.7
AATGTTGTAAA	2.2
AATGTTGTCAA	2.2
AATGTTGTGAA	2.2
AATGTTGTTAA	3.7
AATGTTTAAAA	2.2
AATGTTTACAA	2.2
AATGTTTAGAA	2.2
AATGTTTATAA	3.7
AATGTTTCAAA	2.2
AATGTTTCCAA	2.2
AATGTTTCGAA	2.2
AATGTTTCTAA	3.7
AATGTTTGAAA	3.2
AATGTTTGCAA	3.2
AATGTTTGGAA	3.2
AATGTTTGTAA	6.7
AATGTTTTAAA	2.2
AATGTTTTCAA	2.2
AATGTTTTGAA	2.2
AATGTTTTTAA	3.7
ACAGTAAAAAA	9
ACAGTAAACAA	9
ACAGTAAAGAA	9
ACAGTAAATAA	10.4
ACAGTAACAAA	9
ACAGTAACCAA	9
ACAGTAACGAA	9
ACAGTAACTAA	10.4
ACAGTAAGAAA	12.2
ACAGTAAGCAA	12.2
ACAGTAAGGAA	12.2
ACAGTAAGTAA	15.7
ACAGTAATAAA	9
ACAGTAATCAA	9
ACAGTAATGAA	9
ACAGTAATTAA	10.4
ACAGTACAAAA	7.2
ACAGTACACAA	7.2
ACAGTACAGAA	7.2
ACAGTACATAA	7.2
ACAGTACCAAA	7.2
ACAGTACCCAA	7.2
ACAGTACCGAA	7.2
ACAGTACCTAA	7.2
ACAGTACGAAA	8.9
ACAGTACGCAA	8.9
ACAGTACGGAA	8.9
ACAGTACGTAA	12.4
ACAGTACTAAA	7.2
ACAGTACTCAA	7.2
ACAGTACTGAA	7.2
ACAGTACTTAA	7.2
ACAGTAGAAAA	7.2
ACAGTAGACAA	7.2
ACAGTAGAGAA	7.2
ACAGTAGATAA	7.2
ACAGTAGCAAA	7.2
ACAGTAGCCAA	7.2
ACAGTAGCGAA	7.2
ACAGTAGCTAA	7.2
ACAGTAGGAAA	9.1
ACAGTAGGCAA	9.1
ACAGTAGGGAA	9.1
ACAGTAGGTAA	12.6
ACAGTAGTAAA	7.2
ACAGTAGTCAA	7.2
ACAGTAGTGAA	7.2
ACAGTAGTTAA	7.2
ACAGTATAAAA	7.2
ACAGTATACAA	7.2
ACAGTATAGAA	7.2
ACAGTATATAA	7.2
ACAGTATCAAA	7.2
ACAGTATCCAA	7.2
ACAGTATCGAA	7.2
ACAGTATCTAA	7.2
ACAGTATGAAA	8.9
ACAGTATGCAA	8.9
ACAGTATGGAA	8.9
ACAGTATGTAA	12.4
ACAGTATTAAA	7.2
ACAGTATTCAA	7.2
ACAGTATTGAA	7.2
ACAGTATTTAA	7.2
ACAGTCAAAAA	1.9
ACAGTCAACAA	1.9
ACAGTCAAGAA	1.9
ACAGTCAATAA	3.7
ACAGTCACAAA	1.9
ACAGTCACCAA	1.9
ACAGTCACGAA	1.9
ACAGTCACTAA	3.7
ACAGTCAGAAA	5.1
ACAGTCAGCAA	5.1
ACAGTCAGGAA	5.1
ACAGTCAGTAA	8.6
ACAGTCATAAA	1.9
ACAGTCATCAA	1.9
ACAGTCATGAA	1.9
ACAGTCATTAA	3.7
ACAGTCCAAAA	1.8
ACAGTCCACAA	1.8
ACAGTCCAGAA	1.8
ACAGTCCATAA	3.7
ACAGTCCCAAA	1.8
ACAGTCCCCAA	1.8
ACAGTCCCGAA	1.8
ACAGTCCCTAA	3.7
ACAGTCCGAAA	3.2
ACAGTCCGCAA	3.2
ACAGTCCGGAA	3.2
ACAGTCCGTAA	6.7
ACAGTCCTAAA	1.8
ACAGTCCTCAA	1.8
ACAGTCCTGAA	1.8
ACAGTCCTTAA	3.7
ACAGTCGAAAA	1.8
ACAGTCGACAA	1.8
ACAGTCGAGAA	1.8
ACAGTCGATAA	3.7
ACAGTCGCAAA	1.8
ACAGTCGCCAA	1.8
ACAGTCGCGAA	1.8
ACAGTCGCTAA	3.7
ACAGTCGGAAA	3.2
ACAGTCGGCAA	3.2
ACAGTCGGGAA	3.2
ACAGTCGGTAA	6.7
ACAGTCGTAAA	1.8
ACAGTCGTCAA	1.8
ACAGTCGTGAA	1.8
ACAGTCGTTAA	3.7
ACAGTCTAAAA	1.8
ACAGTCTACAA	1.8
ACAGTCTAGAA	1.8
ACAGTCTATAA	3.7
ACAGTCTCAAA	1.8
ACAGTCTCCAA	1.8
ACAGTCTCGAA	1.8
ACAGTCTCTAA	3.7
ACAGTCTGAAA	3.2
ACAGTCTGCAA	3.2
ACAGTCTGGAA	3.2
ACAGTCTGTAA	6.7
ACAGTCTTAAA	1.8
ACAGTCTTCAA	1.8
ACAGTCTTGAA	1.8
ACAGTCTTTAA	3.7
ACAGTGAAAAA	5.1
ACAGTGAACAA	5.1
ACAGTGAAGAA	5.1
ACAGTGAATAA	6.5
ACAGTGACAAA	5.1
ACAGTGACCAA	5.1
ACAGTGACGAA	5.1
ACAGTGACTAA	6.5
ACAGTGAGAAA	10.3
ACAGTGAGCAA	10.3
ACAGTGAGGAA	10.3
ACAGTGAGTAA	13.8
ACAGTGATAAA	5.1
ACAGTGATCAA	5.1
ACAGTGATGAA	5.1
ACAGTGATTAA	6.5
ACAGTGCAAAA	4.5
ACAGTGCACAA	4.5
ACAGTGCAGAA	4.5
ACAGTGCATAA	4.5
ACAGTGCCAAA	4.5
ACAGTGCCCAA	4.5
ACAGTGCCGAA	4.5
ACAGTGCCTAA	4.5
ACAGTGCGAAA	5
ACAGTGCGCAA	5
ACAGTGCGGAA	5
ACAGTGCGTAA	8.5
ACAGTGCTAAA	4.5
ACAGTGCTCAA	4.5
ACAGTGCTGAA	4.5
ACAGTGCTTAA	4.5
ACAGTGGAAAA	4.5
ACAGTGGACAA	4.5
ACAGTGGAGAA	4.5
ACAGTGGATAA	4.5
ACAGTGGCAAA	4.5
ACAGTGGCCAA	4.5
ACAGTGGCGAA	4.5
ACAGTGGCTAA	4.5
ACAGTGGGAAA	5.8
ACAGTGGGCAA	5.8
ACAGTGGGGAA	5.8
ACAGTGGGTAA	9.3
ACAGTGGTAAA	4.5
ACAGTGGTCAA	4.5
ACAGTGGTGAA	4.5
ACAGTGGTTAA	4.5
ACAGTGTAAAA	4.5
ACAGTGTACAA	4.5
ACAGTGTAGAA	4.5
ACAGTGTATAA	4.5
ACAGTGTCAAA	4.5
ACAGTGTCCAA	4.5
ACAGTGTCGAA	4.5
ACAGTGTCTAA	4.5
ACAGTGTGAAA	5
ACAGTGTGCAA	5
ACAGTGTGGAA	5
ACAGTGTGTAA	8.5
ACAGTGTTAAA	4.5
ACAGTGTTCAA	4.5
ACAGTGTTGAA	4.5
ACAGTGTTTAA	4.5
ACAGTTAAAAA	1.9
ACAGTTAACAA	1.9
ACAGTTAAGAA	1.9
ACAGTTAATAA	3.7
ACAGTTACAAA	1.9
ACAGTTACCAA	1.9
ACAGTTACGAA	1.9
ACAGTTACTAA	3.7
ACAGTTAGAAA	5.1
ACAGTTAGCAA	5.1
ACAGTTAGGAA	5.1
ACAGTTAGTAA	8.6
ACAGTTATAAA	1.9
ACAGTTATCAA	1.9
ACAGTTATGAA	1.9
ACAGTTATTAA	3.7
ACAGTTCAAAA	1.8
ACAGTTCACAA	1.8
ACAGTTCAGAA	1.8
ACAGTTCATAA	3.7
ACAGTTCCAAA	1.8
ACAGTTCCCAA	1.8
ACAGTTCCGAA	1.8
ACAGTTCCTAA	3.7
ACAGTTCGAAA	3.2
ACAGTTCGCAA	3.2
ACAGTTCGGAA	3.2
ACAGTTCGTAA	6.7
ACAGTTCTAAA	1.8
ACAGTTCTCAA	1.8
ACAGTTCTGAA	1.8
ACAGTTCTTAA	3.7
ACAGTTGAAAA	1.8
ACAGTTGACAA	1.8
ACAGTTGAGAA	1.8
ACAGTTGATAA	3.7
ACAGTTGCAAA	1.8
ACAGTTGCCAA	1.8
ACAGTTGCGAA	1.8
ACAGTTGCTAA	3.7
ACAGTTGGAAA	3.2
ACAGTTGGCAA	3.2
ACAGTTGGGAA	3.2
ACAGTTGGTAA	6.7
ACAGTTGTAAA	1.8
ACAGTTGTCAA	1.8
ACAGTTGTGAA	1.8
ACAGTTGTTAA	3.7
ACAGTTTAAAA	1.8
ACAGTTTACAA	1.8
ACAGTTTAGAA	1.8
ACAGTTTATAA	3.7
ACAGTTTCAAA	1.8
ACAGTTTCCAA	1.8
ACAGTTTCGAA	1.8
ACAGTTTCTAA	3.7
ACAGTTTGAAA	3.2
ACAGTTTGCAA	3.2
ACAGTTTGGAA	3.2
ACAGTTTGTAA	6.7
ACAGTTTTAAA	1.8
ACAGTTTTCAA	1.8
ACAGTTTTGAA	1.8
ACAGTTTTTAA	3.7
ACCGTAAAAAA	9
ACCGTAAACAA	9
ACCGTAAAGAA	9
ACCGTAAATAA	10.4
ACCGTAACAAA	9
ACCGTAACCAA	9
ACCGTAACGAA	9
ACCGTAACTAA	10.4
ACCGTAAGAAA	12.2
ACCGTAAGCAA	12.2
ACCGTAAGGAA	12.2
ACCGTAAGTAA	15.7
ACCGTAATAAA	9
ACCGTAATCAA	9
ACCGTAATGAA	9
ACCGTAATTAA	10.4
ACCGTACAAAA	7.2
ACCGTACACAA	7.2
ACCGTACAGAA	7.2
ACCGTACATAA	7.2
ACCGTACCAAA	7.2
ACCGTACCCAA	7.2
ACCGTACCGAA	7.2
ACCGTACCTAA	7.2
ACCGTACGAAA	8.9
ACCGTACGCAA	8.9
ACCGTACGGAA	8.9
ACCGTACGTAA	12.4
ACCGTACTAAA	7.2
ACCGTACTCAA	7.2
ACCGTACTGAA	7.2
ACCGTACTTAA	7.2
ACCGTAGAAAA	7.2
ACCGTAGACAA	7.2
ACCGTAGAGAA	7.2
ACCGTAGATAA	7.2
ACCGTAGCAAA	7.2
ACCGTAGCCAA	7.2
ACCGTAGCGAA	7.2
ACCGTAGCTAA	7.2
ACCGTAGGAAA	9.1
ACCGTAGGCAA	9.1
ACCGTAGGGAA	9.1
ACCGTAGGTAA	12.6
ACCGTAGTAAA	7.2
ACCGTAGTCAA	7.2
ACCGTAGTGAA	7.2
ACCGTAGTTAA	7.2
ACCGTATAAAA	7.2
ACCGTATACAA	7.2
ACCGTATAGAA	7.2
ACCGTATATAA	7.2
ACCGTATCAAA	7.2
ACCGTATCCAA	7.2
ACCGTATCGAA	7.2
ACCGTATCTAA	7.2
ACCGTATGAAA	8.9
ACCGTATGCAA	8.9
ACCGTATGGAA	8.9
ACCGTATGTAA	12.4
ACCGTATTAAA	7.2
ACCGTATTCAA	7.2
ACCGTATTGAA	7.2
ACCGTATTTAA	7.2
ACCGTCAAAAA	1.9
ACCGTCAACAA	1.9
ACCGTCAAGAA	1.9
ACCGTCAATAA	3.7
ACCGTCACAAA	1.9
ACCGTCACCAA	1.9
ACCGTCACGAA	1.9
ACCGTCACTAA	3.7
ACCGTCAGAAA	5.1
ACCGTCAGCAA	5.1
ACCGTCAGGAA	5.1
ACCGTCAGTAA	8.6
ACCGTCATAAA	1.9
ACCGTCATCAA	1.9
ACCGTCATGAA	1.9
ACCGTCATTAA	3.7
ACCGTCCAAAA	1.8
ACCGTCCACAA	1.8
ACCGTCCAGAA	1.8
ACCGTCCATAA	3.7
ACCGTCCCAAA	1.8
ACCGTCCCCAA	1.8
ACCGTCCCGAA	1.8
ACCGTCCCTAA	3.7
ACCGTCCGAAA	3.2
ACCGTCCGCAA	3.2
ACCGTCCGGAA	3.2
ACCGTCCGTAA	6.7
ACCGTCCTAAA	1.8
ACCGTCCTCAA	1.8
ACCGTCCTGAA	1.8
ACCGTCCTTAA	3.7
ACCGTCGAAAA	1.8
ACCGTCGACAA	1.8
ACCGTCGAGAA	1.8
ACCGTCGATAA	3.7
ACCGTCGCAAA	1.8
ACCGTCGCCAA	1.8
ACCGTCGCGAA	1.8
ACCGTCGCTAA	3.7
ACCGTCGGAAA	3.2
ACCGTCGGCAA	3.2
ACCGTCGGGAA	3.2
ACCGTCGGTAA	6.7
ACCGTCGTAAA	1.8
ACCGTCGTCAA	1.8
ACCGTCGTGAA	1.8
ACCGTCGTTAA	3.7
ACCGTCTAAAA	1.8
ACCGTCTACAA	1.8
ACCGTCTAGAA	1.8
ACCGTCTATAA	3.7
ACCGTCTCAAA	1.8
ACCGTCTCCAA	1.8
ACCGTCTCGAA	1.8
ACCGTCTCTAA	3.7
ACCGTCTGAAA	3.2
ACCGTCTGCAA	3.2
ACCGTCTGGAA	3.2
ACCGTCTGTAA	6.7
ACCGTCTTAAA	1.8
ACCGTCTTCAA	1.8
ACCGTCTTGAA	1.8
ACCGTCTTTAA	3.7
ACCGTGAAAAA	5.1
ACCGTGAACAA	5.1
ACCGTGAAGAA	5.1
ACCGTGAATAA	6.5
ACCGTGACAAA	5.1
ACCGTGACCAA	5.1
ACCGTGACGAA	5.1
ACCGTGACTAA	6.5
ACCGTGAGAAA	10.3
ACCGTGAGCAA	10.3
ACCGTGAGGAA	10.3
ACCGTGAGTAA	13.8
ACCGTGATAAA	5.1
ACCGTGATCAA	5.1
ACCGTGATGAA	5.1
ACCGTGATTAA	6.5
ACCGTGCAAAA	4.5
ACCGTGCACAA	4.5
ACCGTGCAGAA	4.5
ACCGTGCATAA	4.5
ACCGTGCCAAA	4.5
ACCGTGCCCAA	4.5
ACCGTGCCGAA	4.5
ACCGTGCCTAA	4.5
ACCGTGCGAAA	5
ACCGTGCGCAA	5
ACCGTGCGGAA	5
ACCGTGCGTAA	8.5
ACCGTGCTAAA	4.5
ACCGTGCTCAA	4.5
ACCGTGCTGAA	4.5
ACCGTGCTTAA	4.5
ACCGTGGAAAA	4.5
ACCGTGGACAA	4.5
ACCGTGGAGAA	4.5
ACCGTGGATAA	4.5
ACCGTGGCAAA	4.5
ACCGTGGCCAA	4.5
ACCGTGGCGAA	4.5
ACCGTGGCTAA	4.5
ACCGTGGGAAA	5.8
ACCGTGGGCAA	5.8
ACCGTGGGGAA	5.8
ACCGTGGGTAA	9.3
ACCGTGGTAAA	4.5
ACCGTGGTCAA	4.5
ACCGTGGTGAA	4.5
ACCGTGGTTAA	4.5
ACCGTGTAAAA	4.5
ACCGTGTACAA	4.5
ACCGTGTAGAA	4.5
ACCGTGTATAA	4.5
ACCGTGTCAAA	4.5
ACCGTGTCCAA	4.5
ACCGTGTCGAA	4.5
ACCGTGTCTAA	4.5
ACCGTGTGAAA	5
ACCGTGTGCAA	5
ACCGTGTGGAA	5
ACCGTGTGTAA	8.5
ACCGTGTTAAA	4.5
ACCGTGTTCAA	4.5
ACCGTGTTGAA	4.5
ACCGTGTTTAA	4.5
ACCGTTAAAAA	1.9
ACCGTTAACAA	1.9
ACCGTTAAGAA	1.9
ACCGTTAATAA	3.7
ACCGTTACAAA	1.9
ACCGTTACCAA	1.9
ACCGTTACGAA	1.9
ACCGTTACTAA	3.7
ACCGTTAGAAA	5.1
ACCGTTAGCAA	5.1
ACCGTTAGGAA	5.1
ACCGTTAGTAA	8.6
ACCGTTATAAA	1.9
ACCGTTATCAA	1.9
ACCGTTATGAA	1.9
ACCGTTATTAA	3.7
ACCGTTCAAAA	1.8
ACCGTTCACAA	1.8
ACCGTTCAGAA	1.8
ACCGTTCATAA	3.7
ACCGTTCCAAA	1.8
ACCGTTCCCAA	1.8
ACCGTTCCGAA	1.8
ACCGTTCCTAA	3.7
ACCGTTCGAAA	3.2
ACCGTTCGCAA	3.2
ACCGTTCGGAA	3.2
ACCGTTCGTAA	6.7
ACCGTTCTAAA	1.8
ACCGTTCTCAA	1.8
ACCGTTCTGAA	1.8
ACCGTTCTTAA	3.7
ACCGTTGAAAA	1.8
ACCGTTGACAA	1.8
ACCGTTGAGAA	1.8
ACCGTTGATAA	3.7
ACCGTTGCAAA	1.8
ACCGTTGCCAA	1.8
ACCGTTGCGAA	1.8
ACCGTTGCTAA	3.7
ACCGTTGGAAA	3.2
ACCGTTGGCAA	3.2
ACCGTTGGGAA	3.2
ACCGTTGGTAA	6.7
ACCGTTGTAAA	1.8
ACCGTTGTCAA	1.8
ACCGTTGTGAA	1.8
ACCGTTGTTAA	3.7
ACCGTTTAAAA	1.8
ACCGTTTACAA	1.8
ACCGTTTAGAA	1.8
ACCGTTTATAA	3.7
ACCGTTTCAAA	1.8
ACCGTTTCCAA	1.8
ACCGTTTCGAA	1.8
ACCGTTTCTAA	3.7
ACCGTTTGAAA	3.2
ACCGTTTGCAA	3.2
ACCGTTTGGAA	3.2
ACCGTTTGTAA	6.7
ACCGTTTTAAA	1.8
ACCGTTTTCAA	1.8
ACCGTTTTGAA	1.8
ACCGTTTTTAA	3.7
ACGGTAAAAAA	12
ACGGTAAACAA	12
ACGGTAAAGAA	12
ACGGTAAATAA	13.4
ACGGTAACAAA	12
ACGGTAACCAA	12
ACGGTAACGAA	12
ACGGTAACTAA	13.4
ACGGTAAGAAA	15.2
ACGGTAAGCAA	15.2
ACGGTAAGGAA	15.2
ACGGTAAGTAA	18.7
ACGGTAATAAA	12
ACGGTAATCAA	12
ACGGTAATGAA	12
ACGGTAATTAA	13.4
ACGGTACAAAA	10.2
ACGGTACACAA	10.2
ACGGTACAGAA	10.2
ACGGTACATAA	10.2
ACGGTACCAAA	10.2
ACGGTACCCAA	10.2
ACGGTACCGAA	10.2
ACGGTACCTAA	10.2
ACGGTACGAAA	11.9
ACGGTACGCAA	11.9
ACGGTACGGAA	11.9
ACGGTACGTAA	15.4
ACGGTACTAAA	10.2
ACGGTACTCAA	10.2
ACGGTACTGAA	10.2
ACGGTACTTAA	10.2
ACGGTAGAAAA	10.2
ACGGTAGACAA	10.2
ACGGTAGAGAA	10.2
ACGGTAGATAA	10.2
ACGGTAGCAAA	10.2
ACGGTAGCCAA	10.2
ACGGTAGCGAA	10.2
ACGGTAGCTAA	10.2
ACGGTAGGAAA	12.1
ACGGTAGGCAA	12.1
ACGGTAGGGAA	12.1
ACGGTAGGTAA	15.6
ACGGTAGTAAA	10.2
ACGGTAGTCAA	10.2
ACGGTAGTGAA	10.2
ACGGTAGTTAA	10.2
ACGGTATAAAA	10.2
ACGGTATACAA	10.2
ACGGTATAGAA	10.2
ACGGTATATAA	10.2
ACGGTATCAAA	10.2
ACGGTATCCAA	10.2
ACGGTATCGAA	10.2
ACGGTATCTAA	10.2
ACGGTATGAAA	11.9
ACGGTATGCAA	11.9
ACGGTATGGAA	11.9
ACGGTATGTAA	15.4
ACGGTATTAAA	10.2
ACGGTATTCAA	10.2
ACGGTATTGAA	10.2
ACGGTATTTAA	10.2
ACGGTCAAAAA	8.1
ACGGTCAACAA	8.1
ACGGTCAAGAA	8.1
ACGGTCAATAA	9.5
ACGGTCACAAA	8.1
ACGGTCACCAA	8.1
ACGGTCACGAA	8.1
ACGGTCACTAA	9.5
ACGGTCAGAAA	11.3
ACGGTCAGCAA	11.3
ACGGTCAGGAA	11.3
ACGGTCAGTAA	14.8
ACGGTCATAAA	8.1
ACGGTCATCAA	8.1
ACGGTCATGAA	8.1
ACGGTCATTAA	9.5
ACGGTCCAAAA	8
ACGGTCCACAA	8
ACGGTCCAGAA	8
ACGGTCCATAA	8
ACGGTCCCAAA	8
ACGGTCCCCAA	8
ACGGTCCCGAA	8
ACGGTCCCTAA	8
ACGGTCCGAAA	8
ACGGTCCGCAA	8
ACGGTCCGGAA	8
ACGGTCCGTAA	11.1
ACGGTCCTAAA	8
ACGGTCCTCAA	8
ACGGTCCTGAA	8
ACGGTCCTTAA	8
ACGGTCGAAAA	8
ACGGTCGACAA	8
ACGGTCGAGAA	8
ACGGTCGATAA	8
ACGGTCGCAAA	8
ACGGTCGCCAA	8
ACGGTCGCGAA	8
ACGGTCGCTAA	8
ACGGTCGGAAA	8
ACGGTCGGCAA	8
ACGGTCGGGAA	8
ACGGTCGGTAA	11.3
ACGGTCGTAAA	8
ACGGTCGTCAA	8
ACGGTCGTGAA	8
ACGGTCGTTAA	8
ACGGTCTAAAA	8
ACGGTCTACAA	8
ACGGTCTAGAA	8
ACGGTCTATAA	8
ACGGTCTCAAA	8
ACGGTCTCCAA	8
ACGGTCTCGAA	8
ACGGTCTCTAA	8
ACGGTCTGAAA	8
ACGGTCTGCAA	8
ACGGTCTGGAA	8
ACGGTCTGTAA	11.1
ACGGTCTTAAA	8
ACGGTCTTCAA	8
ACGGTCTTGAA	8
ACGGTCTTTAA	8
ACGGTGAAAAA	8.6
ACGGTGAACAA	8.6
ACGGTGAAGAA	8.6
ACGGTGAATAA	10
ACGGTGACAAA	8.6
ACGGTGACCAA	8.6
ACGGTGACGAA	8.6
ACGGTGACTAA	10
ACGGTGAGAAA	13.8
ACGGTGAGCAA	13.8
ACGGTGAGGAA	13.8
ACGGTGAGTAA	17.3
ACGGTGATAAA	8.6
ACGGTGATCAA	8.6
ACGGTGATGAA	8.6
ACGGTGATTAA	10
ACGGTGCAAAA	8
ACGGTGCACAA	8
ACGGTGCAGAA	8
ACGGTGCATAA	8
ACGGTGCCAAA	8
ACGGTGCCCAA	8
ACGGTGCCGAA	8
ACGGTGCCTAA	8
ACGGTGCGAAA	8.5
ACGGTGCGCAA	8.5
ACGGTGCGGAA	8.5
ACGGTGCGTAA	12
ACGGTGCTAAA	8
ACGGTGCTCAA	8
ACGGTGCTGAA	8
ACGGTGCTTAA	8
ACGGTGGAAAA	8
ACGGTGGACAA	8
ACGGTGGAGAA	8
ACGGTGGATAA	8
ACGGTGGCAAA	8
ACGGTGGCCAA	8
ACGGTGGCGAA	8
ACGGTGGCTAA	8
ACGGTGGGAAA	9.3
ACGGTGGGCAA	9.3
ACGGTGGGGAA	9.3
ACGGTGGGTAA	13.7
ACGGTGGTAAA	8
ACGGTGGTCAA	8
ACGGTGGTGAA	8
ACGGTGGTTAA	8
ACGGTGTAAAA	8
ACGGTGTACAA	8
ACGGTGTAGAA	8
ACGGTGTATAA	8
ACGGTGTCAAA	8
ACGGTGTCCAA	8
ACGGTGTCGAA	8
ACGGTGTCTAA	8
ACGGTGTGAAA	8.5
ACGGTGTGCAA	8.5
ACGGTGTGGAA	8.5
ACGGTGTGTAA	12
ACGGTGTTAAA	8
ACGGTGTTCAA	8
ACGGTGTTGAA	8
ACGGTGTTTAA	8
ACGGTTAAAAA	8.1
ACGGTTAACAA	8.1
ACGGTTAAGAA	8.1
ACGGTTAATAA	9.5
ACGGTTACAAA	8.1
ACGGTTACCAA	8.1
ACGGTTACGAA	8.1
ACGGTTACTAA	9.5
ACGGTTAGAAA	11.3
ACGGTTAGCAA	11.3
ACGGTTAGGAA	11.3
ACGGTTAGTAA	14.8
ACGGTTATAAA	8.1
ACGGTTATCAA	8.1
ACGGTTATGAA	8.1
ACGGTTATTAA	9.5
ACGGTTCAAAA	8
ACGGTTCACAA	8
ACGGTTCAGAA	8
ACGGTTCATAA	8
ACGGTTCCAAA	8
ACGGTTCCCAA	8
ACGGTTCCGAA	8
ACGGTTCCTAA	8
ACGGTTCGAAA	8
ACGGTTCGCAA	8
ACGGTTCGGAA	8
ACGGTTCGTAA	11.1
ACGGTTCTAAA	8
ACGGTTCTCAA	8
ACGGTTCTGAA	8
ACGGTTCTTAA	8
ACGGTTGAAAA	8
ACGGTTGACAA	8
ACGGTTGAGAA	8
ACGGTTGATAA	8
ACGGTTGCAAA	8
ACGGTTGCCAA	8
ACGGTTGCGAA	8
ACGGTTGCTAA	8
ACGGTTGGAAA	8
ACGGTTGGCAA	8
ACGGTTGGGAA	8
ACGGTTGGTAA	11.3
ACGGTTGTAAA	8
ACGGTTGTCAA	8
ACGGTTGTGAA	8
ACGGTTGTTAA	8
ACGGTTTAAAA	8
ACGGTTTACAA	8
ACGGTTTAGAA	8
ACGGTTTATAA	8
ACGGTTTCAAA	8
ACGGTTTCCAA	8
ACGGTTTCGAA	8
ACGGTTTCTAA	8
ACGGTTTGAAA	8
ACGGTTTGCAA	8
ACGGTTTGGAA	8
ACGGTTTGTAA	11.1
ACGGTTTTAAA	8
ACGGTTTTCAA	8
ACGGTTTTGAA	8
ACGGTTTTTAA	8
ACTGTAAAAAA	9
ACTGTAAACAA	9
ACTGTAAAGAA	9
ACTGTAAATAA	10.4
ACTGTAACAAA	9
ACTGTAACCAA	9
ACTGTAACGAA	9
ACTGTAACTAA	10.4
ACTGTAAGAAA	12.2
ACTGTAAGCAA	12.2
ACTGTAAGGAA	12.2
ACTGTAAGTAA	15.7
ACTGTAATAAA	9
ACTGTAATCAA	9
ACTGTAATGAA	9
ACTGTAATTAA	10.4
ACTGTACAAAA	7.2
ACTGTACACAA	7.2
ACTGTACAGAA	7.2
ACTGTACATAA	7.2
ACTGTACCAAA	7.2
ACTGTACCCAA	7.2
ACTGTACCGAA	7.2
ACTGTACCTAA	7.2
ACTGTACGAAA	8.9
ACTGTACGCAA	8.9
ACTGTACGGAA	8.9
ACTGTACGTAA	12.4
ACTGTACTAAA	7.2
ACTGTACTCAA	7.2
ACTGTACTGAA	7.2
ACTGTACTTAA	7.2
ACTGTAGAAAA	7.2
ACTGTAGACAA	7.2
ACTGTAGAGAA	7.2
ACTGTAGATAA	7.2
ACTGTAGCAAA	7.2
ACTGTAGCCAA	7.2
ACTGTAGCGAA	7.2
ACTGTAGCTAA	7.2
ACTGTAGGAAA	9.1
ACTGTAGGCAA	9.1
ACTGTAGGGAA	9.1
ACTGTAGGTAA	12.6
ACTGTAGTAAA	7.2
ACTGTAGTCAA	7.2
ACTGTAGTGAA	7.2
ACTGTAGTTAA	7.2
ACTGTATAAAA	7.2
ACTGTATACAA	7.2
ACTGTATAGAA	7.2
ACTGTATATAA	7.2
ACTGTATCAAA	7.2
ACTGTATCCAA	7.2
ACTGTATCGAA	7.2
ACTGTATCTAA	7.2
ACTGTATGAAA	8.9
ACTGTATGCAA	8.9
ACTGTATGGAA	8.9
ACTGTATGTAA	12.4
ACTGTATTAAA	7.2
ACTGTATTCAA	7.2
ACTGTATTGAA	7.2
ACTGTATTTAA	7.2
ACTGTCAAAAA	1.9
ACTGTCAACAA	1.9
ACTGTCAAGAA	1.9
ACTGTCAATAA	3.7
ACTGTCACAAA	1.9
ACTGTCACCAA	1.9
ACTGTCACGAA	1.9
ACTGTCACTAA	3.7
ACTGTCAGAAA	5.1
ACTGTCAGCAA	5.1
ACTGTCAGGAA	5.1
ACTGTCAGTAA	8.6
ACTGTCATAAA	1.9
ACTGTCATCAA	1.9
ACTGTCATGAA	1.9
ACTGTCATTAA	3.7
ACTGTCCAAAA	1.8
ACTGTCCACAA	1.8
ACTGTCCAGAA	1.8
ACTGTCCATAA	3.7
ACTGTCCCAAA	1.8
ACTGTCCCCAA	1.8
ACTGTCCCGAA	1.8
ACTGTCCCTAA	3.7
ACTGTCCGAAA	3.2
ACTGTCCGCAA	3.2
ACTGTCCGGAA	3.2
ACTGTCCGTAA	6.7
ACTGTCCTAAA	1.8
ACTGTCCTCAA	1.8
ACTGTCCTGAA	1.8
ACTGTCCTTAA	3.7
ACTGTCGAAAA	1.8
ACTGTCGACAA	1.8
ACTGTCGAGAA	1.8
ACTGTCGATAA	3.7
ACTGTCGCAAA	1.8
ACTGTCGCCAA	1.8
ACTGTCGCGAA	1.8
ACTGTCGCTAA	3.7
ACTGTCGGAAA	3.2
ACTGTCGGCAA	3.2
ACTGTCGGGAA	3.2
ACTGTCGGTAA	6.7
ACTGTCGTAAA	1.8
ACTGTCGTCAA	1.8
ACTGTCGTGAA	1.8
ACTGTCGTTAA	3.7
ACTGTCTAAAA	1.8
ACTGTCTACAA	1.8
ACTGTCTAGAA	1.8
ACTGTCTATAA	3.7
ACTGTCTCAAA	1.8
ACTGTCTCCAA	1.8
ACTGTCTCGAA	1.8
ACTGTCTCTAA	3.7
ACTGTCTGAAA	3.2
ACTGTCTGCAA	3.2
ACTGTCTGGAA	3.2
ACTGTCTGTAA	6.7
ACTGTCTTAAA	1.8
ACTGTCTTCAA	1.8
ACTGTCTTGAA	1.8
ACTGTCTTTAA	3.7
ACTGTGAAAAA	5.1
ACTGTGAACAA	5.1
ACTGTGAAGAA	5.1
ACTGTGAATAA	6.5
ACTGTGACAAA	5.1
ACTGTGACCAA	5.1
ACTGTGACGAA	5.1
ACTGTGACTAA	6.5
ACTGTGAGAAA	10.3
ACTGTGAGCAA	10.3
ACTGTGAGGAA	10.3
ACTGTGAGTAA	13.8
ACTGTGATAAA	5.1
ACTGTGATCAA	5.1
ACTGTGATGAA	5.1
ACTGTGATTAA	6.5
ACTGTGCAAAA	4.5
ACTGTGCACAA	4.5
ACTGTGCAGAA	4.5
ACTGTGCATAA	4.5
ACTGTGCCAAA	4.5
ACTGTGCCCAA	4.5
ACTGTGCCGAA	4.5
ACTGTGCCTAA	4.5
ACTGTGCGAAA	5
ACTGTGCGCAA	5
ACTGTGCGGAA	5
ACTGTGCGTAA	8.5
ACTGTGCTAAA	4.5
ACTGTGCTCAA	4.5
ACTGTGCTGAA	4.5
ACTGTGCTTAA	4.5
ACTGTGGAAAA	4.5
ACTGTGGACAA	4.5
ACTGTGGAGAA	4.5
ACTGTGGATAA	4.5
ACTGTGGCAAA	4.5
ACTGTGGCCAA	4.5
ACTGTGGCGAA	4.5
ACTGTGGCTAA	4.5
ACTGTGGGAAA	5.8
ACTGTGGGCAA	5.8
ACTGTGGGGAA	5.8
ACTGTGGGTAA	9.3
ACTGTGGTAAA	4.5
ACTGTGGTCAA	4.5
ACTGTGGTGAA	4.5
ACTGTGGTTAA	4.5
ACTGTGTAAAA	4.5
ACTGTGTACAA	4.5
ACTGTGTAGAA	4.5
ACTGTGTATAA	4.5
ACTGTGTCAAA	4.5
ACTGTGTCCAA	4.5
ACTGTGTCGAA	4.5
ACTGTGTCTAA	4.5
ACTGTGTGAAA	5
ACTGTGTGCAA	5
ACTGTGTGGAA	5
ACTGTGTGTAA	8.5
ACTGTGTTAAA	4.5
ACTGTGTTCAA	4.5
ACTGTGTTGAA	4.5
ACTGTGTTTAA	4.5
ACTGTTAAAAA	1.9
ACTGTTAACAA	1.9
ACTGTTAAGAA	1.9
ACTGTTAATAA	3.7
ACTGTTACAAA	1.9
ACTGTTACCAA	1.9
ACTGTTACGAA	1.9
ACTGTTACTAA	3.7
ACTGTTAGAAA	5.1
ACTGTTAGCAA	5.1
ACTGTTAGGAA	5.1
ACTGTTAGTAA	8.6
ACTGTTATAAA	1.9
ACTGTTATCAA	1.9
ACTGTTATGAA	1.9
[truncated: 260,145+ more rows]
